# Supplementary material
Source: PubMed Central journal article supplement (PMC140061)
Supplement: nar_30_24_5529__1.pdf [file nar_30_24_5529__1.pdf]

## Supplemental Materials

### Genome-wide Analysis of mRNA Decay in Resting and Activated Primary Human T Lymphocytes

\*Arvind Raghavan, \*Rachel L. Robison, †Cavan Reilly, \*Michelle S. Abelson, \*Shalini Raghavan, \*Jayprakash Vasdewani, §Mitchell Krathwohl, and \*§¶#Paul R. Bohjanen

\*Department of Microbiology; †Division of Biostatistics, School of Public Health; §Department of Medicine, Division of Infectious Diseases; and ¶Center for Immunology; University of Minnesota, Minneapolis, MN 55455

### Contents

**Supplemental Table 1. Transcripts induced after three hours of  $\alpha$ CD3 or  $\alpha$ CD3+ $\alpha$ CD28 stimulation.**

**Supplemental Table 2. Transcripts repressed after three hours of  $\alpha$ CD3 or  $\alpha$ CD3+ $\alpha$ CD28 stimulation.**

**Supplemental Table 3. Activation-induced transcripts that exhibited rapid decay.**

**Supplemental Table 4. Activation-repressed transcripts that exhibited rapid decay in the resting state.**

**Supplemental Table 5. Transcripts that were repressed by activation and exhibited activation-dependent mRNA destabilization.**

**Supplemental Table 6. Short half-life transcripts that contain ARE-like sequence elements.**

**Supplemental Statistical Methods**

**Supplemental Table 1. Transcripts induced after three hours of  $\alpha$ CD3 or  $\alpha$ CD3+ $\alpha$ CD28 stimulation.**

The transcripts shown were induced by  $\alpha$ CD3+ $\alpha$ CD28 stimulation ( $p \leq 0.05$ ) with a fold change of  $> 5.0$ .

$\beta_0$  represents the initial hybridization intensity at the time of actinomycin D addition.

If the Affymetrix software determined a transcript to be absent in at least three of four experiments, the  $\beta_0$  value is not shown.

These  $\beta_0$  values, however, were used to calculate the fold changes for these transcripts.

| Probe      | Accession No. | MEDIA     |             | $\alpha$ CD3 |                |             | $\alpha$ CD3+ $\alpha$ CD28 |                |             | Description                                 |
|------------|---------------|-----------|-------------|--------------|----------------|-------------|-----------------------------|----------------|-------------|---------------------------------------------|
|            |               | $\beta_0$ | 95% C.I.    | $\beta_0$    | 95% C.I.       | Fold Change | $\beta_0$                   | 95% C.I.       | Fold Change |                                             |
| 1538_s_at  | X00695        | Absent    |             | 2517         | [439, 4998]    | 271.2       | 4969                        | [1079, 9243]   | 535.5       | interleukin-2 (IL-2)                        |
| 1400_at    | M13207        | Absent    |             | 7334         | [2049, 12860]  | 191.3       | 11232                       | [3892, 18848]  | 292.9       | GM-CSF                                      |
| 1401_g_at  | M13207        | Absent    |             | 6759         | [1804, 12125]  | 165.9       | 10737                       | [3786, 17801]  | 263.5       | GM-CSF                                      |
| 34021_at   | S82692        | Absent    |             | 3193         | [436, 6566]    | 58.5        | 6244                        | [1218, 11848]  | 114.5       | interleukin-2                               |
| 547_s_at   | S77154        | Absent    |             | 2021         | [469, 3691]    | 89.1        | 2036                        | [584, 3642]    | 89.8        | NGFI-B/nur77 transcrip. factor homolog      |
| 280_g_at   | L13740        | Absent    |             | 5689         | [1035, 10973]  | 84.5        | 5730                        | [1317, 10430]  | 85.1        | TR3 orphan receptor                         |
| 35000_at   | U03398        | Absent    |             | 2926         | [648, 5465]    | 69.9        | 3189                        | [631, 6109]    | 76.2        | 4-1BB ligand                                |
| 39652_at   | AL031736      | Absent    |             | 3620         | [436, 8026]    | 60.2        | 4081                        | [426, 9435]    | 67.8        | lymphotactin                                |
| 40659_at   | U12767        | Absent    |             | 5292         | [1527, 9324]   | 56.6        | 5731                        | [1718, 9957]   | 61.3        | mitogen induced nuclear orphan receptor     |
| 37279_at   | U10550        | Absent    |             | Absent       |                |             | 761                         | [286, 1235]    | 59.4        | Gem GTPase (gem)                            |
| 37623_at   | X75918        | Absent    |             | 3510         | [1138, 5929]   | 55.5        | 3711                        | [1174, 6265]   | 58.6        | NOT (nuclear receptor)                      |
| 33012_at   | L09753        | Absent    |             | 445          | [210, 731]     | 36.6        | 591                         | [106, 1154]    | 48.6        | CD30 ligand                                 |
| 37863_at   | J04076        | Absent    |             | 5163         | [1888, 8467]   | 44.0        | 5590                        | [2195, 9132]   | 47.6        | early growth response 2 protein (EGR2)      |
| 40661_at   | D78579        | Absent    |             | 2098         | [700, 3507]    | 40.6        | 2227                        | [604, 3894]    | 43.1        | neuron derived orphan receptor              |
| 37743_at   | U60060        | Absent    |             | 491          | [91, 941]      | 31.9        | 630                         | [203, 1101]    | 40.9        | zygin 1, isoform 1                          |
| 40662_g_at | D78579        | Absent    |             | 2673         | [912, 4485]    | 36.7        | 2791                        | [711, 5189]    | 38.3        | neuron derived orphan receptor              |
| 34916_s_at | S76792        | Absent    |             | 846          | [243, 1453]    | 13.8        | 2214                        | [549, 3886]    | 36.1        | tax-transcrip. act. glycoprotein 1 receptor |
| 190_at     | U12767        | Absent    |             | 5216         | [1921, 8541]   | 28.8        | 5697                        | [2100, 9558]   | 31.5        | mitogen induced nuclear orphan receptor     |
| 545_g_at   | S76638        | Absent    |             | 662          | [301, 1034]    | 19.9        | 965                         | [335, 1645]    | 29.0        | p50-NF-kappa B homolog                      |
| 544_at     | S76638        | Absent    |             | 994          | [458, 1574]    | 17.4        | 1645                        | [592, 2732]    | 28.7        | p50-NF-kappa B homolog                      |
| 1611_s_at  | J00219        | Absent    |             | 12279        | [2708, 23189]  | 22.1        | 14448                       | [3472, 26178]  | 26.0        | interferon (IFN-gamma)                      |
| 31540_at   | U03397        | Absent    |             | 2339         | [583, 4002]    | 19.1        | 3140                        | [695, 5462]    | 25.6        | receptor protein 4-1BB                      |
| 40375_at   | X63741        | Absent    |             | 7182         | [3306, 11140]  | 25.1        | 7292                        | [2203, 12938]  | 25.4        | pilot (early growth response 3)             |
| 529_at     | U15932        | Absent    |             | 1233         | [559, 1906]    | 11.9        | 2356                        | [1250, 3504]   | 22.8        | dual-specificity protein phosphatase 5      |
| 36296_at   | D12614        | Absent    |             | 1310         | [201, 2628]    | 7.1         | 4143                        | [1416, 6881]   | 22.5        | lymphotoxin (TNF-beta)                      |
| 1237_at    | S81914        | 366       | [299, 452]  | 3835         | [1225, 6486]   | 10.5        | 7366                        | [3254, 11410]  | 20.1        | IEX-1, radiation-ind. Imm.-early gene       |
| 431_at     | X02530        | Absent    |             | 308          | [216, 410]     | 15.9        | 376                         | [240, 537]     | 19.4        | IFN- $\gamma$ inducible early response gene |
| 37627_g_at | D78261        | Absent    |             | 312          | [85, 563]      | 14.5        | 396                         | [71, 777]      | 18.4        | ICSAT transcription factor                  |
| 1852_at    | X02910        | 1066      | [96, 2593]  | 15881        | [5745, 26224]  | 14.9        | 18640                       | [6363, 30772]  | 17.5        | TNF-alpha                                   |
| 37625_at   | U52682        | 652       | [36, 1877]  | 7870         | [4213, 11655]  | 12.1        | 11122                       | [5443, 17168]  | 17.1        | LSIRF/IRF4                                  |
| 32441_at   | X52142        | Absent    |             | 308          | [80, 554]      | 13.9        | 360                         | [99, 638]      | 16.2        | CTP synthetase                              |
| 39528_at   | L24564        | Absent    |             | Absent       |                |             | 936                         | [291, 1594]    | 15.5        | Ras-related associated with diabetes        |
| 41779_at   | U70426        | Absent    |             | 3866         | [1206, 6724]   | 9.8         | 5901                        | [2277, 9473]   | 15.0        | regulator of G-protein signalling 16        |
| 38505_at   | AL050151      | Absent    |             | 1166         | [516, 1827]    | 11.6        | 1467                        | [574, 2375]    | 14.5        |                                             |
| 37716_at   | X05323        | Absent    |             | 2874         | [551, 5658]    | 11.7        | 3461                        | [1386, 5602]   | 14.0        | OX-2 membrane glycoprotein precursor        |
| 36103_at   | D90144        | 1757      | [92, 5329]  | 21860        | [7347, 36636]  | 12.4        | 24652                       | [8669, 40834]  | 14.0        | LD78 alpha precursor                        |
| 40702_at   | X13274        | Absent    |             | 19768        | [7054, 33110]  | 11.2        | 23911                       | [13348, 35260] | 13.6        | interferon-gamma                            |
| 36389_at   | AF001622      | 244       | [16, 657]   | 3219         | [936, 5587]    | 13.2        | 3277                        | [893, 5855]    | 13.4        | MHC I-restricted T cell assoc. molecule     |
| 33112_at   | AF060981      | Absent    |             | 3061         | [353, 5944]    | 14.1        | 2914                        | [195, 6713]    | 13.4        | NK-cell BY55 precursor                      |
| 1021_at    | J00219        | Absent    |             | 24450        | [8929, 40579]  | 10.4        | 30071                       | [19172, 42832] | 12.7        | interferon (IFN-gamma)                      |
| 1368_at    | M27492        | Absent    |             | 217          | [38, 434]      | 8.6         | 318                         | [102, 557]     | 12.6        | interleukin 1 receptor                      |
| 31742_at   | AF064090      | 712       | [134, 1386] | 7854         | [2240, 13703]  | 11.0        | 8773                        | [2981, 14752]  | 12.3        | ligand for herpesvirus entry mediator       |
| 279_at     | L13740        | Absent    |             | 4030         | [694, 7995]    | 12.0        | 4122                        | [869, 7844]    | 12.3        | TR3 orphan receptor                         |
| 41475_at   | U91512        | Absent    |             | Absent       |                |             | 1117                        | [468, 1787]    | 11.8        | adhesion molecule ninjurin 1                |
| 40405_at   | X70991        | Absent    |             | 1779         | [289, 3641]    | 11.3        | 1854                        | [392, 3528]    | 11.8        | NGFI-A binding protein 2                    |
| 32609_at   | AI885852      | Absent    |             | 2141         | [336, 4187]    | 7.9         | 3055                        | [513, 5837]    | 11.3        | H2A histone family, member O                |
| 1851_s_at  | U11821        | Absent    |             | 2076         | [878, 3289]    | 12.2        | 1910                        | [611, 3295]    | 11.2        | Fas ligand (FasL)                           |
| 33849_at   | U020206       | 202       | [23, 449]   | 1858         | [638, 3080]    | 9.2         | 2259                        | [780, 3760]    | 11.2        | pre-B cell enhancing factor (PBEF)          |
| 1292_at    | L11329        | 771       | [132, 1558] | 7228         | [1852, 13155]  | 9.4         | 7966                        | [2804, 13205]  | 10.3        | protein tyrosine phosphatase (PAC-1)        |
| 36239_at   | Z49194        | Absent    |             | 698          | [246, 1185]    | 10.5        | 672                         | [286, 1062]    | 10.2        | oct-binding factor                          |
| 1263_at    | M20137        | Absent    |             | 2073         | [286, 4230]    | 6.6         | 3064                        | [583, 5996]    | 9.8         | interleukin 3 (IL-3)                        |
| 39858_s_at | AF071504      | Absent    |             | 196          | [55, 343]      | 5.8         | 324                         | [137, 518]     | 9.7         | syntaxin 11                                 |
| 41048_at   | D90070        | Absent    |             | 1158         | [444, 1912]    | 7.9         | 1416                        | [473, 2416]    | 9.6         | ATL-derived PMA-responsive peptide          |
| 31495_at   | D63789        | Absent    |             | 32271        | [17793, 47614] | 8.6         | 35706                       | [23386, 50521] | 9.5         | SCM-1beta precursor                         |
| 41778_at   | U53347        | Absent    |             | 3978         | [1152, 7062]   | 7.9         | 4743                        | [2086, 7537]   | 9.4         | neutral amino acid transporter B            |
| 40385_at   | U64197        | 550       | [199, 938]  | 2052         | [635, 3541]    | 3.7         | 5148                        | [1797, 8970]   | 9.4         | chemokine exodus-1                          |

|            |          |        |              |              |                |      |               |                |                                                    |                                            |
|------------|----------|--------|--------------|--------------|----------------|------|---------------|----------------|----------------------------------------------------|--------------------------------------------|
| 39857_at   | AF044309 | Absent | 379          | [163, 590]   | 5.5            | 627  | [171, 1101]   | 9.1            | syntaxin 11                                        |                                            |
| AFFX-HUMT  | M11507   | Absent | 163          | [54, 273]    | 6.5            | 227  | [28, 484]     | 9.0            | transferrin receptor (p90, CD71)                   |                                            |
| 38272_at   | AF038844 | Absent | 590          | [204, 990]   | 6.9            | 744  | [311, 1196]   | 8.6            | MKP-1 like protein tyrosine phosphatase            |                                            |
| 258_at     | M16441   | Absent | 951          | [154, 1899]  | 3.0            | 2709 | [963, 4478]   | 8.6            | TNF and lymphotoxin genes                          |                                            |
| 39799_at   | M94856   | 216    | [45, 408]    | 1580         | [990, 2283]    | 7.3  | 1846          | [1015, 2793]   | 8.5                                                | PA-FABP                                    |
| 40074_at   | X16396   | 735    | [284, 1219]  | 4779         | [1753, 7792]   | 6.5  | 6008          | [2603, 9425]   | 8.2                                                | methylene THFD cyclohydrolase              |
| 35943_s_at | D13317   | Absent | 224          | [64, 399]    | 5.1            | 354  | [104, 623]    | 8.1            | GA-binding protein transcription factor, $\beta$ 1 |                                            |
| 259_s_at   | M16441   | Absent | 5526         | [1838, 9487] | 5.7            | 7712 | [2803, 12946] | 7.9            | TNF and lymphotoxin genes                          |                                            |
| 1891_at    | D14497   | Absent | 496          | [125, 898]   | 4.8            | 815  | [290, 1367]   | 7.8            | MKKK 8                                             |                                            |
| 39143_at   | U08015   | Absent | 5392         | [1991, 8969] | 8.7            | 4779 | [1081, 9031]  | 7.7            | NF-ATc                                             |                                            |
| 40982_at   | AA926957 | Absent | 454          | [132, 789]   | 6.1            | 546  | [241, 857]    | 7.3            | hypothetical protein FLJ10534                      |                                            |
| 287_at     | L19871   | Absent | 265          | [67, 488]    | 6.7            | 291  | [87, 506]     | 7.3            | activating transcription factor 3 (ATF3)           |                                            |
| 32640_at   | M24283   | Absent | 184          | [69, 303]    | 4.0            | 334  | [84, 594]     | 7.3            | major group rhinovirus receptor (HRV)              |                                            |
| 33755_at   | AB014604 | Absent | 524          | [153, 932]   | 6.1            | 619  | [198, 1061]   | 7.2            | oxysterol-binding protein-like protein 3           |                                            |
| 41592_at   | AB000734 | Absent | 382          | [107, 685]   | 4.1            | 674  | [351, 996]    | 7.2            | TIP3 (JAK binding protein)                         |                                            |
| 36520_at   | AB014590 | Absent | 276          | [41, 562]    | 4.4            | 451  | [141, 783]    | 7.2            | KIAA0690 protein                                   |                                            |
| 31496_g_at | D63789   | 5299   | [189, 19049] | 34706        | [24869, 47263] | 6.5  | 37814         | [27320, 51154] | 7.1                                                | SCM-1beta precursor                        |
| 1858_at    | D38122   | 673    | [155, 1242]  | 4632         | [1973, 7226]   | 6.9  | 4756          | [1847, 7607]   | 7.1                                                | Fas ligand(FasL)                           |
| 1521_at    | X17620   | 328    | [73, 615]    | 2029         | [1314, 2910]   | 6.2  | 2300          | [1776, 2963]   | 7.0                                                | Nm23(homolog to <i>Dros . Awd</i> protein) |
| 40362_at   | X61498   | Absent | 753          | [351, 1181]  | 4.6            | 1126 | [450, 1823]   | 7.0            | NF-kB (p49/p100) subunit                           |                                            |
| 1985_s_at  | X73066   | 477    | [94, 922]    | 2890         | [2155, 3856]   | 6.1  | 3243          | [2358, 4438]   | 6.8                                                | non-metastatic cells 1 protein             |
| 36674_at   | J04130   | 4576   | [201, 15139] | 28221        | [21677, 35528] | 6.2  | 30915         | [24682, 38115] | 6.8                                                | Act-2(small inducible cytokine A4)         |
| 1856_at    | X75042   | 518    | [216, 841]   | 2291         | [1044, 3614]   | 4.4  | 3482          | [1754, 5482]   | 6.7                                                | rel proto-oncogene                         |
| 2042_s_at  | M15024   | 212    | [73, 351]    | 1149         | [300, 2067]    | 5.4  | 1411          | [241, 2821]    | 6.7                                                | c-myb viral oncogene homolog (avian)       |
| 2002_s_at  | U27467   | 471    | [180, 783]   | 2431         | [646, 4307]    | 5.2  | 3002          | [989, 5041]    | 6.4                                                | Bcl-2 related (Bfl-1)                      |
| 37645_at   | Z22576   | 1305   | [298, 2420]  | 7887         | [4431, 11375]  | 6.0  | 8244          | [3227, 13399]  | 6.3                                                | CD69 antigen (p60)                         |
| 31615_i_at | U94902   | Absent | 260          | [35, 553]    | 4.7            | 346  | [60, 708]     | 6.3            | soluble CD44                                       |                                            |
| 1473_s_at  | U22376   | Absent | 152          | [42, 270]    | 5.0            | 182  | [22, 408]     | 6.0            | c-myb                                              |                                            |
| 41193_at   | AB013382 | 96     | [64, 136]    | 397          | [117, 691]     | 4.2  | 566           | [200, 944]     | 5.9                                                | dual specificity phosphatase 6, isoform b  |
| 33891_at   | AL080061 | Absent | 241          | [119, 369]   | 4.3            | 329  | [194, 472]    | 5.9            |                                                    |                                            |
| 33342_at   | AF039029 | Absent | 534          | [196, 893]   | 6.3            | 485  | [161, 830]    | 5.7            | snurportin1                                        |                                            |
| 37536_at   | Z11697   | 579    | [195, 1001]  | 1586         | [609, 2597]    | 2.7  | 3291          | [1799, 4806]   | 5.7                                                | CD83 antigen                               |
| 2049_s_at  | M29039   | 251    | [24, 93]     | 1073         | [449, 1689]    | 4.3  | 1426          | [549, 2299]    | 5.7                                                | jun B proto-oncogene                       |
| 34770_at   | Z14138   | Absent | Absent       | Absent       |                |      | 257           | [85, 429]      | 5.4                                                | MKKK 8                                     |
| 40365_at   | M63904   | Absent | 360          | [159, 568]   | 3.6            | 533  | [199, 881]    | 5.3            | G protein, alpha 15 (Gq class)                     |                                            |
| 32186_at   | M80244   | 2220   | [632, 4003]  | 11041        | [4164, 18141]  | 5.0  | 11720         | [4570, 19039]  | 5.3                                                | solute carrier family 7, member 5          |
| 37275_at   | U13045   | Absent | 446          | [118, 795]   | 4.7            | 496  | [121, 907]    | 5.2            | nuclear respiratory factor-2 subunit $\beta$ 1     |                                            |
| 1378_g_at  | M58603   | 1495   | [916, 2206]  | 5512         | [2078, 8961]   | 3.7  | 7708          | [4380, 11773]  | 5.2                                                | nuclear factor $\kappa$ -B(NF $\kappa$ B)  |
| 973_at     | Y10032   | Absent | 483          | [177, 809]   | 2.5            | 994  | [521, 1477]   | 5.1            | serum/glucocorticoid regulated kinase              |                                            |
| 34140_at   | AL109679 | Absent | Absent       | Absent       |                |      | 55            | [20, 91]       | 5.1                                                | chromosome 15 open reading frame 5         |
| 33720_at   | L48692   | 222    | [103, 345]   | 944          | [259, 1718]    | 4.2  | 1133          | [412, 1859]    | 5.1                                                | clone p5-23-3                              |
| 41447_at   | AB023207 | 488    | [218, 756]   | 2198         | [1007, 3421]   | 4.5  | 2477          | [972, 3991]    | 5.1                                                | carbohydrate (chondroitin) synthase 1      |

**Supplemental Table 2. Transcripts repressed after three hours of  $\alpha$ CD3 or  $\alpha$ CD3+ $\alpha$ CD28 stimulation.**

The transcripts shown were repressed by  $\alpha$ CD3+ $\alpha$ CD28 stimulation ( $p \leq 0.05$ ) with a fold change of  $> 5.0$ .

$\beta_0$  represents the initial hybridization intensity at the time of actinomycin D addition.

| Probe      | Accession No. | MEDIA     |              | $\alpha$ CD3 |             | $\alpha$ CD3+ $\alpha$ CD28 |                | Description |                                               |
|------------|---------------|-----------|--------------|--------------|-------------|-----------------------------|----------------|-------------|-----------------------------------------------|
|            |               | $\beta_0$ | 95% C.I.     | $\beta_0$    | 95% C.I.    | Fold Change                 | $\beta_0$      |             | 95% C.I.                                      |
| 34619_at   | X72925        | 560       | [66, 1227]   | Absent       |             | 2.9                         | Absent         | 26.5        | desmocollin type 1                            |
| 1108_s_at  | M18391        | 703       | [381, 1063]  | Absent       |             | 6.2                         | Absent         | 21.8        | tyrosine kinase receptor (EphA1)              |
| 37764_at   | D87328        | 163       | [24, 334]    | Absent       |             | 3.5                         | Absent         | 18.6        | holocarboxylase synthetase                    |
| 33766_at   | X77777        | 1020      | [318, 1772]  | Absent       |             | 3.3                         | 57 [2, 190]    | 17.9        |                                               |
| 40472_at   | AF007155      | 294       | [31, 692]    | Absent       |             | 2.3                         | Absent         | 14.9        |                                               |
| 356_at     | AB017430      | 355       | [25, 918]    | Absent       |             | 3.9                         | Absent         | 12.7        | kinesin-like DNA binding protein              |
| 38546_at   | AB006537      | 179       | [14, 446]    | Absent       |             | 6.4                         | Absent         | 12.0        | interleukin 1 receptor accessory protein      |
| 38799_at   | AF068706      | 972       | [91, 1925]   | Absent       |             | 2.6                         | Absent         | 11.3        | gamma2-adaptin (G2AD)                         |
| 936_s_at   |               | 454       | [64, 900]    | Absent       |             | 3.1                         | Absent         | 10.3        | Protein Phosphatase Inhibitor Homolog         |
| 37590_g_at | AL109698      | 1237      | [1040, 1442] | 239          | [132, 209]  | 5.2                         | 125 [19, 250]  | 9.9         |                                               |
| 38639_at   | AF040963      | 541       | [371, 754]   | Absent       |             | 3.2                         | Absent         | 9.7         | Mad4 homolog                                  |
| 1919_at    | X16316        | 570       | [163, 1025]  | Absent       |             | 3.3                         | Absent         | 9.4         | vav oncogene                                  |
| 38859_at   | AL080141      | 383       | [41, 719]    | 37           | [2, 283]    | 3.6                         | 42 [2, 132]    | 9.0         | secretory pathway component Sec31B-1          |
| 38531_at   | AA428150      | 474       | [184, 809]   | 118          | [55, 538]   | 3.6                         | Absent         | 8.9         | hypothetical protein FLJ22709                 |
| 32565_at   | U66619        | 444       | [58, 811]    | Absent       |             | 2.4                         | Absent         | 8.8         | SWI/SNF complex 60 KDa subunit                |
| 35662_at   | U20536        | 316       | [63, 601]    | Absent       |             | 3.1                         | Absent         | 8.3         | cysteine protease Mch2 isoform alpha          |
| 36724_s_at | U95626        | 606       | [171, 1056]  | 100          | [26, 446]   | 3.9                         | 77 [19, 142]   | 7.9         | ccr2a,2b,5,6 genes and lactoferrin            |
| 1606_at    | L36645        | 1051      | [695, 1473]  | 124          | [52, 103]   | 5.4                         | Absent         | 7.8         | receptor protein-tyrosine kinase (EphA4)      |
| 36200_at   | X69838        | 1176      | [263, 2095]  | 106          | [64, 505]   | 2.6                         | 151 [15, 333]  | 7.8         | ankyrin repeat-containing protein             |
| 36941_at   | U16954        | 611       | [404, 828]   | Absent       |             | 3.5                         | Absent         | 7.8         | AF1Q protein                                  |
| 37199_at   | AI760932      | 218       | [53, 393]    | Absent       |             | 4.0                         | Absent         | 7.7         | CGI-60 protein                                |
| 40976_at   | AF052432      | 973       | [393, 1563]  | Absent       |             | 6.0                         | Absent         | 7.6         | katanin p80 subunit                           |
| 269_at     | L40387        | 1560      | [846, 2309]  | 270          | [159, 479]  | 2.6                         | Absent         | 7.4         | thyroid receptor interactor (TRIP14)          |
| 34858_at   | D79998        | 858       | [496, 1231]  | 209          | [113, 393]  | 3.4                         | 119 [21, 233]  | 7.2         |                                               |
| 36626_at   | X87176        | 246       | [61, 457]    | 32           | [2, 553]    | 3.3                         | Absent         | 7.1         | hydroxysteroid (17- $\beta$ ) dehydrogenase 4 |
| 33914_r_at | D00726        | 77        | [35, 118]    | Absent       |             | 3.7                         | Absent         | 7.0         | ferrochelatase                                |
| 364_s_at   | Z16411        | 85        | [32, 136]    | Absent       |             | 2.9                         | Absent         | 7.0         | phospholipase C, beta 3                       |
| 35283_at   | H05692        | 337       | [84, 604]    | Absent       |             | 2.6                         | Absent         | 7.0         | hypothetical protein FLJ10738                 |
| 40599_at   | AL109669      | 856       | [477, 1235]  | 143          | [61, 355]   | 3.2                         | 123 [42, 210]  | 7.0         |                                               |
| 38318_at   | AL050128      | 2317      | [1694, 2992] | 361          | [266, 1443] | 5.0                         | 334 [103, 574] | 6.9         |                                               |
| 943_at     | D43968        | 487       | [93, 972]    | Absent       |             | 4.2                         | 70 [2, 275]    | 6.9         | AML1b protein (alt. spliced product)          |
| 34498_at   | D89974        | 1031      | [753, 1338]  | Absent       |             | 2.9                         | Absent         | 6.8         | vanin 2, isoform 1                            |
| 35234_at   | D50406        | 422       | [146, 733]   | 57           | [38, 231]   | 4.3                         | 62 [10, 122]   | 6.8         | RECK protein precursor                        |
| 31869_at   | AB014540      | 184       | [81, 288]    | Absent       |             | 4.0                         | Absent         | 6.7         |                                               |
| 34914_at   | U94778        | 697       | [178, 1262]  | Absent       |             | 3.0                         | Absent         | 6.6         | Pro-Ser-Thr phosphatase interact. protein 1   |
| 36732_at   | AI004207      | 1390      | [998, 1933]  | 274          | [76, 240]   | 3.1                         | 211 [18, 499]  | 6.6         |                                               |
| 35532_i_at | AJ001683      | 200       | [48, 362]    | Absent       |             | 2.9                         | Absent         | 6.6         | NKG2F                                         |
| 35198_at   | AF070596      | 409       | [282, 571]   | Absent       |             | 2.5                         | 63 [8, 136]    | 6.5         |                                               |
| 1202_g_at  | D14889        | 2432      | [1540, 3327] | 437          | [82, 491]   | 4.5                         | 375 [44, 817]  | 6.5         | RAB33A, member RAS oncogene family            |
| 41656_at   | AF043325      | 2151      | [1788, 2502] | 323          | [239, 6026] | 2.7                         | 332 [188, 491] | 6.5         | Gly-peptide N-tetradecanoyltransferase 2      |
| 35346_at   | AB007856      | 207       | [25, 462]    | 54           | [7, 65]     | 6.3                         | 33 [2, 93]     | 6.3         | FEM-1-like death receptor binding protein     |
| 31927_s_at | D86062        | 508       | [156, 889]   | Absent       |             | 3.8                         | Absent         | 6.3         | chromosome 21 ORF 33                          |
| 37098_at   | D38537        | 824       | [630, 1078]  | Absent       |             | 4.2                         | Absent         | 6.3         | protoporphyrinogen oxidase                    |
| 38888_at   | AF055636      | 86        | [12, 179]    | Absent       |             | 4.1                         | Absent         | 6.2         | Leu-rich glioma-inact. protein precursor      |
| 41446_f_at | H68340        | 3570      | [2445, 4919] | 448          | [44, 787]   | 2.5                         | 575 [33, 1603] | 6.2         | RNA helicase-related protein                  |
| 35659_at   | U00672        | 3599      | [1915, 5270] | 707          | [301, 670]  | 5.6                         | 581 [67, 1262] | 6.2         | interleukin-10 receptor                       |
| 743_at     | D50370        | 309       | [157, 461]   | Absent       |             | 2.9                         | 50 [5, 109]    | 6.2         | nucleosome assembly protein                   |
| 41107_at   | AB002372      | 706       | [510, 921]   | Absent       |             | 2.6                         | Absent         | 6.2         | syntaphilin                                   |
| 37616_at   | X79888        | 841       | [667, 1033]  | Absent       |             | 2.5                         | 137 [59, 222]  | 6.2         | enoyl-Coenzyme A hydratase precursor          |
| 32332_at   | X694331       | 1377      | [818, 1928]  | 220          | [105, 960]  | 3.5                         | 226 [107, 347] | 6.1         | isocitrate dehydrogenase 2                    |
| 41700_at   | M62424        | 887       | [513, 1336]  | 154          | [91, 3996]  | 2.5                         | 146 [55, 247]  | 6.1         | coagulation factor II receptor precursor      |
| 40041_at   | AF017790      | 256       | [79, 454]    | 73           | [42, 22]    | 4.9                         | Absent         | 6.0         | retinoblastoma-associated protein HEC         |
| 318_at     | D64142        | 763       | [131, 1522]  | Absent       |             | 2.7                         | Absent         | 6.0         | histone H1x                                   |
| 37363_at   | AB007889      | 804       | [376, 1283]  | 156          | [106, 758]  | 2.5                         | 135 [53, 228]  | 6.0         | KIAA0429 gene product                         |
| 40684_at   | U78190        | 2948      | [2370, 3704] | 528          | [386, 845]  | 2.6                         | 498 [375, 651] | 5.9         | GTP cyclohydrolase1 feedback reg. protein     |
| 40497_at   | AF040707      | 1309      | [956, 1763]  | 331          | [181, 1218] | 2.7                         | 222 [45, 426]  | 5.9         | candidate tumor suppressor gene 21            |
| 33113_at   | U65093        | 2139      | [1146, 3112] | 456          | [286, 154]  | 3.1                         | 368 [123, 635] | 5.8         | Cbp/p300-interacting transactivator           |
| 36792_at   | Z24727        | 643       | [518, 783]   | 112          | [78, 538]   | 3.6                         | 111 [23, 213]  | 5.8         | tropomyosin 1 (alpha)                         |

|            |          |      |              |        |             |        |        |                                   |     |                                          |
|------------|----------|------|--------------|--------|-------------|--------|--------|-----------------------------------|-----|------------------------------------------|
| 41120_at   | D14686   | 781  | [216, 1233]  | Absent | 3.6         | Absent | 5.8    | glycine cleavage system T-protein |     |                                          |
| 589_at     | M32313   | 258  | [178, 363]   | 30     | [3, 1772]   | 3.1    | Absent | steroid 5-alpha-reductase         |     |                                          |
| 36790_at   | M19267   | 635  | [454, 871]   | 86     | [58, 795]   | 3.1    | 111    | [38, 186]                         | 5.7 | tropomyosin 1 (alpha)                    |
| 41266_at   | X53586   | 2646 | [1716, 3669] | 462    | [305, 263]  | 2.1    | 463    | [268, 685]                        | 5.7 | integrin alpha 6                         |
| 40102_at   | AB018315 | 334  | [208, 470]   | Absent |             | 3.2    | Absent |                                   | 5.7 | oxysterol-binding protein-like protein 2 |
| 40296_at   | AL023653 | 3874 | [3102, 4653] | 685    | [451, 153]  | 3.8    | 679    | [198, 1205]                       | 5.7 |                                          |
| 36843_at   | AB005666 | 1504 | [1192, 1825] | 333    | [157, 2377] | 2.7    | 264    | [72, 473]                         | 5.7 | signal-induced prolifer.-assoc. gene 1   |
| 34194_at   | AL049313 | 434  | [267, 634]   | 95     | [49, 903]   | 3.8    | 76     | [32, 123]                         | 5.7 |                                          |
| 35409_r_at | X16281   | 292  | [127, 457]   | Absent |             | 3.8    | Absent |                                   | 5.7 | zinc finger protein (clone 431)          |
| 31732_at   | X00948   | 791  | [431, 1151]  | 144    | [61, 62]    | 0.8    | 140    | [15, 315]                         | 5.7 | prepro-relaxin H2                        |
| 37827_r_at | AJ237839 | 223  | [124, 330]   | Absent |             | 5.0    | Absent |                                   | 5.6 | chromosome 21 ORF 5                      |
| 35575_f_at | AI698340 | 256  | [40, 532]    | Absent |             | 3.3    | Absent |                                   | 5.6 | DNA-binding protein                      |
| 32181_at   | M60922   | 2495 | [1721, 3429] | 536    | [419, 634]  | 2.8    | 449    | [71, 881]                         | 5.6 | flotillin 2                              |
| 35288_at   | AB007884 | 218  | [85, 355]    | Absent |             | 3.2    | Absent |                                   | 5.5 | Cdc42 guanine exchange factor 9          |
| 35958_at   | AL050379 | 680  | [216, 1201]  | Absent |             | 2.6    | Absent |                                   | 5.5 |                                          |
| 33759_at   | X04327   | 737  | [502, 985]   | 152    | [115, 718]  | 3.4    | 135    | [34, 242]                         | 5.5 | 2,3-bisphosphoglycerate mutase           |
| 1127_at    | L07597   | 1647 | [1313, 2007] | 346    | [173, 437]  | 4.1    | 301    | [36, 648]                         | 5.5 | ribosomal protein S6 kinase 1            |
| 35775_at   | AF070592 | 401  | [132, 704]   | Absent |             | 3.5    | Absent |                                   | 5.5 |                                          |
| 1347_at    | S78187   | 7426 | [6305, 8881] | 1184   | [909, 552]  | 4.1    | 1370   | [753, 2041]                       | 5.4 | cdc25+ homolog                           |
| 41409_at   | AF044896 | 1514 | [1130, 1918] | 341    | [208, 68]   | 3.4    | 281    | [41, 585]                         | 5.4 | ICB-1 (basement membrane-induced gene)   |
| 1068_g_at  | U03858   | 2185 | [620, 3988]  | 343    | [164, 636]  | 4.2    | 406    | [32, 1024]                        | 5.4 | fms-related tyrosine kinase 3 ligand     |
| 37242_at   | U79260   | 1469 | [605, 2368]  | 359    | [121, 554]  | 3.8    | 274    | [27, 625]                         | 5.4 |                                          |
| 38065_at   | X62534   | 5098 | [3224, 7181] | 1011   | [599, 126]  | 3.8    | 956    | [517, 1,451]                      | 5.3 | HMG-2                                    |
| 34530_at   | W73822   | 2952 | [1751, 4104] | 650    | [339, 1080] | 3.3    | 555    | [68, 1219]                        | 5.3 |                                          |
| 34632_r_at | Z23091   | 132  | [63, 204]    | Absent |             | 3.7    | Absent |                                   | 5.3 | platelet glycoprotein V precursor        |
| 32314_g_at | M12125   | 519  | [81, 1006]   | Absent |             | 4.3    | 98     | [14, 193]                         | 5.3 | tropomyosin 2 (beta)                     |
| 41018_at   | AL050015 | 1432 | [1116, 1765] | Absent |             | 4.3    | Absent |                                   | 5.3 | DKFZP564O243 protein                     |
| 1061_at    | U00672   | 3763 | [2164, 5352] | 823    | [433, 315]  | 4.0    | 718    | [212, 1240]                       | 5.2 | interleukin-10 receptor                  |
| 32630_f_at | Y07827   | 343  | [251, 472]   | Absent |             | 7.9    | Absent |                                   | 5.2 | butyrophilin, subfamily 3, member A1     |
| 40607_at   | U97105   | 1187 | [847, 1550]  | 258    | [136, 554]  | 3.7    | 230    | [136, 338]                        | 5.2 | dihydropyrimidinase-like 2               |
| 32672_at   | AL049387 | 1065 | [706, 1549]  | 199    | [153, 59]   | 3.7    | 207    | [85, 333]                         | 5.1 |                                          |
| 35756_at   | AF089816 | 2262 | [863, 3729]  | 470    | [235, 220]  | 3.2    | 448    | [83, 875]                         | 5.1 | RGS-GAIP interacting protein GIPC        |
| 35922_at   | Y08982   | 108  | [42, 178]    | Absent |             | 2.2    | Absent |                                   | 5.0 | synaptonemal complex protein 2           |
| 39382_at   | AB011089 | 243  | [124, 381]   | Absent |             | 4.7    | 48     | [10, 87]                          | 5.0 | tripartite motif protein TRIM2           |
| 39865_at   | AI890903 | 2249 | [1650, 3005] | 433    | [314, 303]  | 2.4    | 450    | [256, 671]                        | 5.0 |                                          |
| 34292_at   | X92475   | 878  | [563, 1202]  | 214    | [110, 337]  | 4.2    | 177    | [25, 369]                         | 5.0 | chromosome X ORF 12                      |
| 34198_at   | U12128   | 253  | [68, 458]    | 50     | [13, 36]    | 5.0    | Absent |                                   | 5.0 | protein tyrosine phosphatase 1E (PTP1E)  |

**Supplemental Table 3. Activation-induced transcripts exhibiting rapid decay.**

The transcripts shown were induced (p<.05) with a fold change of greater than 2.5 and had half-lives of less than or equal to 60 minutes under the  $\alpha$ CD3+ $\alpha$ CD28 condition.

| Probe      | Accession Number | $\alpha$ CD3            |            | $\alpha$ CD3+ $\alpha$ CD28 |            | DESCRIPTION                                        |
|------------|------------------|-------------------------|------------|-----------------------------|------------|----------------------------------------------------|
|            |                  | Half-life<br>in minutes | [95% C.I.] | Half-life<br>in minutes     | [95% C.I.] |                                                    |
| 1292_at    | L11329           | 8                       | [1, 15]    | 8                           | [1, 15]    | protein tyrosine phosphatase (PAC-1)               |
| 529_at     | U15932           | 8                       | [1, 20]    | 8                           | [1, >360]  | dual-specificity protein phosphatase 5             |
| 2049_s_at  | M29039           | 20                      | [1, 35]    | 11                          | [1, 28]    | jun B proto-oncogene                               |
| 32640_at   | M24283           | 10                      | [1, >360]  | 15                          | [1, >360]  | major group rhinovirus receptor (HRV)              |
| 41690_at   | AL049471         | 17                      | [1, 32]    | 16                          | [1, 28]    |                                                    |
| 41779_at   | U70426           | 17                      | [1, 28]    | 17                          | [1, 30]    | regulator of G-protein signalling 16               |
| 35000_at   | U03398           | 16                      | [1, 22]    | 18                          | [10, 22]   | 4-1BB ligand                                       |
| 41592_at   | AB000734         | 8                       | [1, 15]    | 18                          | [12, 29]   | TIP3 (JAK binding protein)                         |
| 40405_at   | X70991           | 25                      | [22, 35]   | 18                          | [1, 41]    | NGFI-A binding protein 2                           |
| 38767_at   | AF041037         | 43                      | [21, 88]   | 18                          | [2, 53]    | antagonist of FGF signaling (sprouty-1)            |
| 37724_at   | V00568           | 8                       | [1, 20]    | 18                          | [2, 28]    | c-myc oncogene                                     |
| 1237_at    | S81914           | 25                      | [7, 37]    | 20                          | [2, 32]    | IEX-1, radiation-inducible imm.-early gene         |
| 1916_s_at  | V01512           | 10                      | [1, 26]    | 20                          | [2, 35]    | oncogene c-fos                                     |
| 39857_at   | AF044309         | 31                      | [17, 54]   | 21                          | [15, >360] | syntaxin 11                                        |
| 36718_s_at | L42452           | Absent                  |            | 22                          | [1, >360]  | pyruvate dehydrogenase kinase 3 (PDK3)             |
| 1851_s_at  | U11821           | 24                      | [8, 29]    | 24                          | [5, 33]    | Fas ligand (FasL)                                  |
| 39528_at   | L24564           | Absent                  |            | 25                          | [16, 29]   | Ras-related associated with diabetes               |
| 280_g_at   | L13740           | 25                      | [22, 29]   | 25                          | [22, 31]   | TR3 orphan receptor                                |
| 37536_at   | Z11697           | 37                      | [27, 46]   | 25                          | [22, 29]   | CD83 antigen                                       |
| 279_at     | L13740           | 25                      | [22, 32]   | 25                          | [15, 43]   | TR3 orphan receptor                                |
| 37623_at   | X75918           | 25                      | [22, 29]   | 25                          | [22, 29]   | NOT (nuclear receptor)                             |
| 1461_at    | M69043           | 25                      | [21, 34]   | 25                          | [21, 33]   | MAD-3 (I $\kappa$ B-like activity)                 |
| 37279_at   | U10550           | Absent                  |            | 25                          | [1, 45]    | Gem GTPase (gem)                                   |
| 1858_at    | D38122           | 25                      | [15, 34]   | 26                          | [18, 35]   | Fas ligand (FasL)                                  |
| 37544_at   | X64318           | 36                      | [14, 47]   | 26                          | [3, 51]    | E4BP4 gene                                         |
| 32855_at   | L00352           | 18                      | [1, 51]    | 27                          | [18, 40]   | low density lipoprotein receptor                   |
| 287_at     | L19871           | 25                      | [15, 33]   | 28                          | [12, 38]   | activating transcription factor 3 (ATF3)           |
| 41259_at   | AI553745:        | 24                      | [1, 59]    | 29                          | [17, 45]   |                                                    |
| 37310_at   | X02419           | 38                      | [24, 73]   | 29                          | [20, 47]   | uPA                                                |
| 224_at     | S81439           | 25                      | [14, 34]   | 29                          | [15, 35]   | early growth response gene alpha                   |
| 1337_s_at  | X06614           | Absent                  |            | 29                          | [15, 35]   | receptor of retinoic acid                          |
| 38374_at   | AF050110         | 32                      | [24, 36]   | 30                          | [20, 36]   | early growth response protein alpha                |
| 34258_at   | W28205           | 39                      | [11, >360] | 30                          | [1, 85]    |                                                    |
| 39858_s_at | AF071504         | 35                      | [8, >360]  | 30                          | [22, 47]   | syntaxin 11                                        |
| 1852_at    | X02910           | 25                      | [15, 31]   | 31                          | [17, 42]   | TNF alpha (cachectin)                              |
| 37627_g_at | D78261           | 38                      | [23, 43]   | 32                          | [26, 40]   | ICSAT transcription factor                         |
| 38640_at   | AI582831         | 25                      | [9, 143]   | 32                          | [19, 55]   |                                                    |
| 37028_at   | U83981           | 29                      | [15, >360] | 32                          | [15, 59]   | apoptosis associated protein (GADD34)              |
| 41193_at   | AB013382         | 32                      | [23, 48]   | 34                          | [22, 56]   | dual specificity phosphatase 6, isoform b          |
| 35943_s_at | D13317           | 42                      | [29, 68]   | 34                          | [20, 60]   | GA-binding protein transcription factor, $\beta$ 1 |
| 1911_s_at  | M60974           | 33                      | [29, 42]   | 34                          | [25, 42]   | DNA-damage-inducible protein (gadd45)              |

|            |          |        |            |    |            |                                              |
|------------|----------|--------|------------|----|------------|----------------------------------------------|
| 40659_at   | U12767   | 31     | [16, 48]   | 34 | [29, 48]   | mitogen induced nuclear orphan receptor      |
| 33342_at   | AF039029 | 20     | [2, >360]  | 34 | [22, >360] | snurportin1                                  |
| 34770_at   | Z14138   | Absent |            | 36 | [16, 53]   | MKKK 8                                       |
| 259_s_at   | M16441   | 29     | [8, 36]    | 36 | [22, 47]   | TNF and lymphotoxin genes                    |
| 35714_at   | U89606   | 63     | [2, >360]  | 37 | [15, >360] | pyridoxal kinase                             |
| 973_at     | Y10032   | 59     | [22, >360] | 37 | [9, 54]    | serum/glucocorticoid regulated kinase        |
| 37863_at   | J04076   | 36     | [16, 47]   | 37 | [22, 54]   | early growth response 2 protein (EGR2)       |
| 40516_at   | L19872   | 46     | [43, 49]   | 38 | [23, 61]   | AH-receptor                                  |
| 33085_at   | U64863   | 32     | [29, 36]   | 38 | [23, 50]   | hPD-1                                        |
| 31821_at   | AB011167 | 32     | [24, 42]   | 38 | [26, 72]   | KIAA0595 protein                             |
| 253_g_at   | L42324   | 32     | [29, 36]   | 38 | [23, 45]   | G protein-linked receptor gene, 5            |
| 31742_at   | AF064090 | 32     | [29, 42]   | 38 | [29, 47]   | ligand for herpesvirus entry mediator        |
| 41447_at   | AB023207 | 32     | [29, 39]   | 38 | [29, 43]   | carbohydrate (chondroitin) synthase 1        |
| 40661_at   | D78579   | 38     | [29, 48]   | 39 | [30, 44]   | neuron derived orphan receptor               |
| 40365_at   | M63904   | 33     | [29, 50]   | 39 | [29, 47]   | G protein, alpha 15 (Gq class)               |
| 37275_at   | U13045   | 26     | [18, 41]   | 39 | [36, 43]   | nuclear respiratory factor-2 subunit beta 1  |
| 1401_g_at  | M13207   | 18     | [10, 22]   | 39 | [33, 43]   | GM-CSF                                       |
| 37917_at   | AC004982 | 50     | [43, 61]   | 39 | [32, 55]   |                                              |
| 252_at     | L42324   | 38     | [29, 49]   | 39 | [36, 43]   | G protein-linked receptor gene, 5            |
| 38272_at   | AF038844 | 29     | [2, 47]    | 39 | [36, 48]   | MKP-1 like protein tyrosine phosphatase      |
| 41778_at   | U53347   | 39     | [33, 53]   | 40 | [33, 49]   | neutral amino acid transporter B             |
| 2031_s_at  | U03106   | 34     | [22, 56]   | 40 | [30, 58]   | wild-type p53 activated fragment-1 (WAF1)    |
| 32441_at   | X52142   | 27     | [1, >360]  | 41 | [31, >360] | CTP synthetase                               |
| 36389_at   | AF001622 | 45     | [29, >360] | 41 | [26, 86]   | MHC I-restricted T cell associated molecule  |
| 36711_at   | AL021977 | 27     | [9, 56]    | 42 | [25, 92]   | v-maf like protein                           |
| 34782_at   | AL021938 | 47     | [38, 58]   | 42 | [36, 56]   | JUMONJI                                      |
| 33513_at   | U33017   | 33     | [29, 56]   | 42 | [29, 63]   | signaling lymphocytic activ. molecule (SLAM) |
| 2002_s_at  | U27467   | 39     | [31, 49]   | 42 | [28, 60]   | Bcl-2 related (Bfl-1)                        |
| 849_g_at   | U19261   | 57     | [30, 64]   | 43 | [31, 56]   | Epstein-Barr virus-induced protein           |
| 31616_r_at | U94902   | 78     | [64, 90]   | 43 | [31, 90]   | soluble CD44                                 |
| 1519_at    | J04102   | 37     | [8, 49]    | 44 | [18, 53]   | ets-2                                        |
| 2042_s_at  | M15024   | 52     | [35, 61]   | 44 | [35, 56]   | c-myb viral oncogene homolog (avian)         |
| 38692_at   | AF045451 | 42     | [36, 59]   | 45 | [36, 57]   | transcriptional regulatory protein p54 mRNA  |
| 37318_at   | X81625   | 44     | [35, 55]   | 45 | [36, 56]   | Cl1 protein                                  |
| 190_at     | U12767   | 40     | [29, 53]   | 45 | [36, 51]   | mitogen induced nuclear orphan receptor      |
| 1400_at    | M13207   | 24     | [15, 33]   | 45 | [16, 74]   | GM-CSF                                       |
| 1891_at    | D14497   | 46     | [37, 50]   | 46 | [38, 50]   | MKKK 8                                       |
| 39172_at   | AL049319 | 48     | [23, 159]  | 46 | [24, 71]   |                                              |
| 1265_g_at  | M25393   | 40     | [35, 66]   | 46 | [41, 88]   | protein tyrosine phosphatase                 |
| 41475_at   | U91512   | Absent |            | 46 | [37, >360] | adhesion molecule ninjurin 1                 |
| 40662_g_at | D78579   | 44     | [33, 55]   | 47 | [43, 56]   | neuron derived orphan receptor               |
| 37645_at   | Z22576   | 45     | [36, 49]   | 47 | [39, 56]   | CD69 antigen (p60)                           |
| 848_at     | U19261   | 65     | [39, 129]  | 47 | [25, >360] | Epstein-Barr virus-induced protein           |
| 40074_at   | X16396   | 40     | [33, 49]   | 49 | [36, 62]   | MTD cyclohydrolase                           |
| 547_s_at   | S77154   | 44     | [36, 51]   | 50 | [36, 57]   | NGFI-B/nur77 $\beta$ -type homolog           |
| 37625_at   | U52682   | 53     | [43, 77]   | 50 | [39, 88]   | LSIRF/IRF4                                   |
| 37218_at   | D64110   | 57     | [36, 97]   | 51 | [43, 69]   | ANA                                          |
| 35008_at   | AB002345 | 45     | [36, 54]   | 51 | [36., 56]  |                                              |
| 34948_at   | AI820065 | 84     | [28, >360] | 51 | [39, 77]   |                                              |

|            |          |        |            |    |            |                                          |
|------------|----------|--------|------------|----|------------|------------------------------------------|
| 33338_at   | M97936   | 73     | [52, 97]   | 51 | [43, 61]   | transcription factor ISGF-3              |
| 36520_at   | AB014590 | 53     | [23, >360] | 51 | [9, >360]  | KIAA0690 protein                         |
| 39882_at   | U66035   | Absent |            | 53 | [43, >360] | X-linked deafness dystonia protein (DDP) |
| 570_at     | M83221   | 80     | [61, >360] | 54 | [50, 98]   | I-Rel                                    |
| 37377_i_at | M13452   | 70     | [50, >360] | 54 | [45, >360] | lamin A                                  |
| 38994_at   | AF037989 | 72     | [44, 119]  | 55 | [36, 91]   | STAT-induced STAT inhibitor-2 mRNA       |
| 37716_at   | X05323   | 41     | [24, 80]   | 58 | [35, >360] | OX-2 membrane glycoprotein precursor     |
| 514_at     | U26710   | 60     | [57, 63]   | 60 | [51, 76]   | cbl-b                                    |
| 31882_at   | AJ001340 | 159    | [36, >360] | 60 | [51, 164]  | U3 snoRNP associated 55 kDa protein      |
| 32186_at   | M80244   | 59     | [47, 77]   | 60 | [47, 73]   | solute carrier family 7, member 5        |



**Supplemental Table 4. Activation-repressed transcripts that exhibited rapid decay in the resting state.**

The transcripts shown were repressed ( $p < 0.05$ ) by greater than 2.5 fold three hours following  $\alpha$ CD3+ $\alpha$ CD28 stimulation and had half-lives of less than or equal to 60 minutes under the media condition.

| Probe      | Accession No. | Media           |            | Description                                |
|------------|---------------|-----------------|------------|--------------------------------------------|
|            |               | Half-life (min) | 95% C.I.   |                                            |
| 507_s_at   | U43189        | 17              | [1, >360]  | NERF-1a and NERF-1b                        |
| 943_at     | D43968        | 18              | [1, >360]  | AML1 oncogene                              |
| 38045_at   | U96136        | 23              | [1, 55]    | catenin, delta 2                           |
| 1202_g_at  | D14889        | 24              | [9, 33]    | RAB33A, member RAS oncogene family         |
| 1857_at    | AF010193      | 25              | [18, 47]   | MAD 7 (Drosophila)                         |
| 35659_at   | U00672        | 25              | [22, >360] | interleukin 10 receptor, alpha             |
| 36402_at   | AL096747      | 25              | [15, 57]   |                                            |
| 39421_at   | D43969        | 26              | [16, >360] | aml1 oncogene                              |
| 39013_at   | Y11588        | 27              | [10, 44]   | APG5 autophagy 5-like (S. cerevisiae)      |
| 39411_at   | AL080156      | 29              | [14, 57]   |                                            |
| 40852_at   | AB025254      | 29              | [2, >360]  |                                            |
| 32587_at   | U07802        | 30              | [22, 49]   | Tis11d                                     |
| 35346_at   | AB007856      | 31              | [1, >360]  | FEM-1-like death receptor binding protein  |
| 1061_at    | U00672        | 32              | [29, >360] | interleukin 10 receptor, alpha             |
| 1201_at    | D14889        | 33              | [24, 42]   | RAB33A, member RAS oncogene family         |
| 33113_at   | U65093        | 33              | [29, 48]   | Cbp/p300-interacting transactivator        |
| 37694_at   | D87685        | 33              | [29, 43]   | KIAA0244 protein                           |
| 41329_at   | AI458463      | 33              | [28, 156]  | hypothetical protein LOC57147              |
| 35233_r_at | AI056696      | 34              | [10, >360] | alpha integrin binding protein 63          |
| 35588_at   | AB011414      | 34              | [13, 61]   | Kruppel-type zinc finger (C2H2)            |
| 32034_at   | AF041259      | 35              | [22, 64]   | zinc finger protein 217                    |
| 34491_at   | AJ225089      | 36              | [29, 84]   | 2'-5'-oligoadenylate synthetase-like       |
| 38823_s_at | AI961743      | 36              | [29, >360] | Ser/Thr kinase 17a (apoptosis-inducing)    |
| 40727_at   | AL080090      | 36              | [22, 102]  | anaphase-promoting complex subunit 10      |
| 1062_g_at  | U00672        | 37              | [29, 48]   | interleukin 10 receptor, alpha             |
| 33741_at   | AI741756      | 37              | [22, 81]   | CGI-11 protein                             |
| 269_at     | L40387        | 39              | [36, 47]   | thyroid receptor interactor (TRIP14)       |
| 32588_s_at | X78992        | 39              | [29, 54]   | butyrate response factor 2                 |
| 33123_at   | L10379        | 39              | [36, 48]   |                                            |
| 34530_at   | W73822        | 39              | [36, 47]   |                                            |
| 36741_at   | D63482        | 39              | [36, 53]   | GPCR kinase-interactor 2                   |
| 37256_at   | AI829890      | 39              | [30, 76]   |                                            |
| 38342_at   | D87076        | 39              | [31, 61]   | KIAA0239 protein                           |
| 39753_at   | X06256        | 39              | [31, 51]   | integrin alpha 5 subunit                   |
| 41457_at   | AB007883      | 39              | [24, >360] |                                            |
| 32777_at   | Y12478        | 40              | [22, >360] | tryptophan rich basic protein              |
| 36009_at   | AF091092      | 41              | [30, 126]  | weakly similar to glutathione peroxidase 2 |
| 36896_s_at | AF044288      | 41              | [23, >360] | AH receptor nuclear translocator-like      |
| 1056_s_at  | M90391        | 42              | [36, >360] | interleukin 16                             |
| 40290_f_at | L13972        | 42              | [30, 99]   | sialyltransferase 4A                       |
| 32541_at   | S46622        | 43              | [29, 224]  | calcineurin A catalytic subunit            |
| 32833_at   | M59287        | 43              | [7, >360]  |                                            |
| 36190_at   | M63256        | 43              | [32, >360] |                                            |

|            |          |    |            |                                             |
|------------|----------|----|------------|---------------------------------------------|
| 649_s_at   | L06797   | 43 | [36, 50]   | chemokine (C-X-C motif), receptor 4         |
| 37242_at   | U79260   | 44 | [30, >360] |                                             |
| 33249_at   | M16801   | 45 | [32, 56]   | mineralocorticoid receptor mRNA (hMR)       |
| 33889_s_at | D79985   | 45 | [30, 99]   | integral membrane protein DGCR2             |
| 34299_at   | AL096880 | 45 | [32, >360] | zinc finger protein 278                     |
| 36696_at   | AB000359 | 45 | [25, >360] |                                             |
| 34957_at   | Y18504   | 46 | [34, >360] |                                             |
| 37617_at   | U90912   | 46 | [43, 49]   |                                             |
| 38669_at   | D86959   | 46 | [32, >360] | Ste20-related serine/threonine kinase       |
| 38822_at   | AB011420 | 46 | [43, 49]   | Ser/Thr kinase 17a (apoptosis-inducing)     |
| 587_at     | M31210   | 46 | [37, 54]   | endothelial differentiation protein (edg-1) |
| 38719_at   | U03985   | 47 | [39, 56]   | N-ethylmaleimide-sensitive factor           |
| 39932_at   | AI655015 | 47 | [36, >360] |                                             |
| 40084_at   | U03494   | 47 | [37, >360] | transcription factor CP2                    |
| 31732_at   | X00948   | 48 | [29, >360] | prepro-relaxin H2                           |
| 40570_at   | AF032885 | 48 | [40, 58]   | forkhead box O1A                            |
| 41796_at   | AB029015 | 48 | [41, 63]   |                                             |
| 40567_at   | X01703   | 49 | [43, 67]   | alpha-tubulin                               |
| 40646_at   | U20350   | 49 | [43, >360] | chemokine (C-X3-C) receptor 1               |
| 34433_at   | AF035299 | 50 | [36, >360] | docking protein 1                           |
| 32669_at   | AB014571 | 51 | [16, >360] | KIAA0671 gene product                       |
| 34268_at   | X91809   | 51 | [34, >360] | G protein signalling regulator 19           |
| 38526_at   | U02882   | 52 | [36, 187]  | phosphodiesterase 4D                        |
| 32087_at   | M65217   | 53 | [36, >360] | heat shock transcription factor 2           |
| 33220_at   | Z11773   | 53 | [50, >360] |                                             |
| 34871_at   | W30677   | 53 | [43, 162]  |                                             |
| 35848_at   | AL049432 | 53 | [50, 57]   |                                             |
| 40320_at   | AF000367 | 53 | [50, 95]   | CDC14 homolog A                             |
| 39038_at   | AF093118 | 54 | [36, >360] | fibulin 5                                   |
| 41352_at   | X62822   | 54 | [44, 79]   | sialyltransferase 1                         |
| 31869_at   | AB014540 | 55 | [43, >360] |                                             |
| 37180_at   | X14034   | 55 | [38, 139]  | phospholipase C, gamma 2                    |
| 37907_at   | M34677   | 55 | [43, >360] | coagulation factor VIII-associated protein  |
| 40654_at   | U88871   | 55 | [13, >360] | peroxisomal biogenesis factor 7             |
| 1052_s_at  | M83667   | 56 | [37, >360] | NF-IL6-beta protein                         |
| 319_g_at   | D64142   | 56 | [50, 65]   | H1 histone family, member X                 |
| 35203_at   | AB002381 | 57 | [43, 75]   | histone acetyltransferase                   |
| 40876_at   | U31525   | 57 | [43, 63]   | glycogenin                                  |
| 32332_at   | X69433   | 58 | [39, >360] | mitochondrial isocitrate dehydrogenase      |
| 35815_at   | AL049470 | 58 | [44, >360] |                                             |
| 37399_at   | D17793   | 58 | [30, >360] | aldo-keto reductase family 1, member C3     |
| 38984_at   | AB007896 | 58 | [37, >360] |                                             |
| 752_s_at   | D85429   | 58 | [49, 69]   | DnaJ homolog, subfam. B, memb. 1            |
| 33881_at   | AA977580 | 59 | [36, 92]   | long-chain fatty-acid-Coenzyme A ligase 3   |
| 35937_at   | U65416   | 59 | [43, >360] |                                             |
| 36724_s_at | U95626   | 59 | [39, >360] | ccr2a,2b,5,6 genes and lactoferrin          |
| 37980_at   | U03644   | 59 | [44, >360] | CBF1 interacting corepressor                |
| 41672_at   | AF007128 | 59 | [51, 64]   |                                             |
| 600_at     | M28215   | 59 | [36, >360] | RAB5A, member RAS oncogene family           |
| 743_at     | D50370   | 59 | [39, >360] | nucleosome assembly protein 1-like 3        |

|          |          |    |           |                                            |
|----------|----------|----|-----------|--------------------------------------------|
| 761_g_at | Y09216   | 59 | [44, 63]  | dual-specificity kinase 2 isoform 1        |
| 33602_at | AJ000479 | 60 | [52, 91]  | GPCR (EDG6)                                |
| 35319_at | U25435   | 60 | [45, 83]  | CCCTC-binding factor (zinc finger protein) |
| 35944_at | AL031228 | 60 | [50, 80]  |                                            |
| 39924_at | AB020660 | 60 | [50, 120] | KIAA0853 protein                           |
| 40098_at | AF001434 | 60 | [57, 63]  | EH domain containing 1                     |
| 40656_at | D85730   | 60 | [50, 139] | heat shock 70kD protein 1-like             |

**Supplemental Table 5. Transcripts that were repressed by activation and exhibited activation-dependent mRNA destabilization.**

The transcripts shown in the top section had half-lives of greater than 2 hours in the media condition and less than 2 hours in the  $\alpha$ CD3+ $\alpha$ CD28 condition, were repressed greater than 2.5-fold by  $\alpha$ CD3+ $\alpha$ CD28 stimulation, and exhibited transcript destabilization in the  $\alpha$ CD3+ $\alpha$ CD28 condition ( $p < .05$ ).

The transcripts shown in the bottom section had half-lives of greater than 2 hours in the media condition, were repressed greater than 2.5 fold by  $\alpha$ CD3 or  $\alpha$ CD3+ $\alpha$ CD28 activation, and went from Present to Absent upon stimulation (according to Affymetrix software).

| PROBE_ID   | Accession No. | MEDIA                   |             | $\alpha$ CD3            |              | $\alpha$ CD3+ $\alpha$ CD28 |            | Description                                                      |
|------------|---------------|-------------------------|-------------|-------------------------|--------------|-----------------------------|------------|------------------------------------------------------------------|
|            |               | Half-life<br>in minutes | [95% C.I.]  | Half-life<br>in minutes | [95% C.I.]   | Half-life<br>in minutes     | [95% C.I.] |                                                                  |
| 34283_at   | AL050125      | >360                    | [40, >360]  | 32                      | [27, 44]     | 25                          | [6, 75]    |                                                                  |
| 34979_at   | AB018323      | >360                    | [51, >360]  | 66                      | [10, >360]   | 39                          | [29, 64]   |                                                                  |
| 41611_at   | L40371        | >360                    | [77, >360]  | 97                      | [44, >360]   | 39                          | [29, 278]  | activating signal cointegrator 1                                 |
| 41462_at   | AF065482      | >360                    | [93, >360]  | 53                      | [37, >360]   | 44                          | [23, >360] | sorting nexin 2                                                  |
| 32668_at   | AL080076      | 154                     | [63, >360]  | 40                      | [22, 63]     | 45                          | [36, 50]   | single-stranded DNA binding protein 2                            |
| 35790_at   | AF054179      | 131                     | [68, >360]  | 41                      | [32, 56]     | 47                          | [43, 56]   | vacuolar protein sorting 26 (yeast)                              |
| 38470_i_at | D86981        | 137                     | [91, >360]  | 53                      | [50, 61]     | 47                          | [32, 76]   | amyloid beta precursor protein-binding protein 2                 |
| 38774_at   | U77942        | >360                    | [92, >360]  | 161                     | [102, >360]  | 52                          | [25, 165]  | syntaxin 7                                                       |
| 34269_at   | AL050102      | >360                    | [262, >360] | 59                      | [37, 92]     | 53                          | [45, >360] |                                                                  |
| 36012_at   | Y09631        | >360                    | [66, >360]  | 46                      | [43, 50]     | 54                          | [36, 77]   | progesterone-induced blocking factor 1                           |
| 39000_at   | AF043324      | >360                    | [142, >360] | 59                      | [29, >360]   | 55                          | [37, 82]   | N-myristoyltransferase 1                                         |
| 38010_at   | AF002697      | 125                     | [93, >360]  | 50                      | [36, >360]   | 56                          | [50, 95]   | BCL2/adenovirus E1B 19kD-interacting protein 3                   |
| 32212_at   | AL049703      | >360                    | [343, >360] | 46                      | [36, 63]     | 57                          | [23, 348]  | programmed cell death 8 (apoptosis-inducing factor)              |
| 35140_at   | R59697        | >360                    | [88, >360]  | 74                      | [60, 106]    | 59                          | [43, >360] | cyclin-dependent kinase 8                                        |
| 34733_at   | X85237        | 180                     | [134, >360] | 74                      | [63, 101]    | 60                          | [57, 77]   | splicing factor 3a, subunit 1, 120kD                             |
| 35642_at   | AF053551      | 203                     | [58, >360]  | 124                     | [91, >360]   | 60                          | [50, 108]  | metaxin 2                                                        |
| 38281_at   | U67319        | 128                     | [67, >360]  | 89                      | [54, >360]   | 61                          | [52, 87]   | caspase 7, isoform delta precursor                               |
| 36913_at   | U75679        | >360                    | [94, >360]  | 75                      | [52, >360]   | 67                          | [32, 165]  | stem-loop (histone) binding protein                              |
| 1189_at    | X85753        | >360                    | [177, >360] | 232                     | [94, >360]   | 68                          | [54, 110]  | cyclin-dependent kinase 8                                        |
| 35199_at   | AB023199      | 190                     | [80, >360]  | 70                      | [51, >360]   | 68                          | [51, 96]   | KIAA0982 protein                                                 |
| 38670_at   | AL031685      | 144                     | [83, >360]  | 69                      | [58, >360]   | 68                          | [59, 84]   |                                                                  |
| 32125_at   | AA928996      | >360                    | [222, >360] | 100                     | [72, >360]   | 69                          | [51, >360] |                                                                  |
| 36629_at   | AI635895      | >360                    | [87, >360]  | 60                      | [53, 68]     | 69                          | [61, 221]  | delta sleep inducing peptide, immunoreactor                      |
| 38802_at   | Y12711        | >360                    | [116, >360] | 57                      | [43, >360]   | 69                          | [54, 121]  | progesterone binding protein                                     |
| 41288_at   | AL036744      | 217                     | [79, >360]  | 87                      | [58, >360]   | 71                          | [64, 121]  |                                                                  |
| 33893_r_at | AB007939      | >360                    | [97, >360]  | 53                      | [44, >360]   | 72                          | [51, >360] | KARP-1-binding protein                                           |
| 36032_at   | AL031427      | 312                     | [138, >360] | 60                      | [57, 68]     | 72                          | [59, 113]  |                                                                  |
| 38398_at   | AB002356      | 127                     | [103, 204]  | 134                     | [73, >360]   | 73                          | [64, 137]  | MAP-kinase activating death domain                               |
| 40805_at   | AB007900      | 255                     | [78, >360]  | 18                      | [1, >360]    | 73                          | [60, 92]   | KIAA0440 protein                                                 |
| 32042_at   | S72904        | >360                    | [157, >360] | >360                    | [154, >360]  | 74                          | [64, >360] | cytosolic ovarian carcinoma antigen 1                            |
| 32804_at   | AF091263      | 235                     | [107, >360] | 63                      | [44, >360]   | 74                          | [50, >360] | RNA binding motif protein 5                                      |
| 33835_at   | AB018264      | 134                     | [78, >360]  | 61                      | [50, 86]     | 74                          | [70, 82]   | KIAA0721 protein                                                 |
| 34039_at   | AJ001383      | >360                    | [193, >360] | 187                     | [50, >360]   | 74                          | [58, 91]   | lymphocyte antigen 94 (mouse) homolog (NK-p46)                   |
| 34779_at   | R90942        | >360                    | [>360]      | >360                    | [>360, >360] | 76                          | [64, >360] | NeuAc-alpha-2,3-Gal-beta-1,3-GalNAc-alpha-2, 6-sialyltransferase |
| 33886_at   | AF006516      | 170                     | [76, >360]  | 67                      | [57, 84]     | 77                          | [50, 91]   | spectrin SH3 domain binding protein 1                            |
| 36473_at   | AB023220      | >360                    | [290, >360] | 128                     | [104, >360]  | 77                          | [64, >360] | ubiquitin specific protease 20                                   |

|            |          |      |             |      |              |     |            |                                                                  |
|------------|----------|------|-------------|------|--------------|-----|------------|------------------------------------------------------------------|
| 37729_at   | Y08614   | >360 | [185, >360] | 92   | [59, >360]   | 80  | [71, 94]   | exportin 1                                                       |
| 34825_at   | AL031775 | >360 | [129, >360] | 81   | [57, >360]   | 81  | [50, 208]  |                                                                  |
| 37962_r_at | D63506   | 162  | [115, 214]  | 81   | [65, >360]   | 81  | [61, >360] | syntaxin 4 binding protein                                       |
| 40961_at   | X72889   | 324  | [136, >360] | 88   | [70, >360]   | 81  | [67, 97]   | SWI/SNF related, subf                                            |
| 36013_at   | AF006621 | >360 | [141, >360] | 81   | [70, >360]   | 83  | [57, >360] | chromosome 4 open reading frame 1                                |
| 35847_at   | AB028980 | >360 | [117, >360] | 88   | [84, >360]   | 84  | [58, >360] |                                                                  |
| 39442_at   | AL080115 | >360 | [165, >360] | 79   | [61, 102]    | 84  | [62, >360] | DKFZP564G0222 protein                                            |
| 33305_at   | M93056   | >360 | [129, >360] | 53   | [50, >360]   | 85  | [52, >360] |                                                                  |
| 37619_at   | D42084   | 213  | [159, >360] | 82   | [60, >360]   | 86  | [71, 128]  |                                                                  |
| 40868_at   | AA442799 | 331  | [138, >360] | 74   | [59, 133]    | 86  | [56, >360] | hypothetical protein FLJ20274                                    |
| 1496_at    | M34668   | >360 | [176, >360] | 99   | [77, 112]    | 87  | [79, 91]   | protein tyrosine phosphatase, receptor type, A                   |
| 176_at     | U37352   | 162  | [118, 192]  | 86   | [55, >360]   | 87  | [72, 100]  | protein phosphatase 2, regulatory subunit B (B56), gamma isoform |
| 33228_g_at | AI984234 | >360 | [101, >360] | 102  | [74, >360]   | 87  | [70, 117]  | interleukin 10 receptor, beta                                    |
| 38831_f_at | AF053356 | 178  | [144, 181]  | 82   | [59, >360]   | 87  | [70, 105]  |                                                                  |
| 879_at     | M30818   | 149  | [101, >360] | 130  | [85, >360]   | 87  | [72, 102]  | myxovirus (influenza virus) resistance 2 (mouse)                 |
| 32569_at   | L13385   | >360 | [101, >360] | 77   | [59, >360]   | 88  | [65, 140]  | PAF acetylhydrolase, isoform lb, alpha subunit                   |
| 33748_at   | D86976   | >360 | [107, >360] | 115  | [99, 281]    | 88  | [84, 104]  |                                                                  |
| 38119_at   | X12496   | 277  | [198, >360] | >360 | [107, >360]  | 88  | [84, 107]  | glycophorin C, isoform 1 NM_016815 glycophorin C, isoform 2      |
| 39897_at   | N36997   | 188  | [96, >360]  | 81   | [71, >360]   | 88  | [76, 298]  | DEAD/H (Asp-Glu-Ala-Asp/His) box polypeptide 16                  |
| 39117_at   | AB014562 | >360 | [144, >360] | 109  | [80, >360]   | 90  | [74, 222]  |                                                                  |
| 40786_at   | U37352   | 123  | [101, >360] | 73   | [55, >360]   | 90  | [53, >360] | protein phosphatase 2, regulatory subunit B (B56), gamma isoform |
| 32038_s_at | AI739308 | 199  | [175, 296]  | 108  | [78, >360]   | 91  | [81, 125]  | 46kD arginine/serine-rich splicing factor                        |
| 36102_at   | AF038962 | >360 | [196, >360] | 74   | [58, >360]   | 91  | [78, >360] | voltage-dependent anion channel 3                                |
| 36633_at   | AA114830 | 241  | [187, >360] | 84   | [61, 118]    | 92  | [59, >360] | A kinase (PRKA) anchor protein 10                                |
| 41699_f_at | AL080149 | >360 | [155, >360] | 105  | [86, 253]    | 93  | [85, >360] | bromodomain-containing protein 1                                 |
| 1873_at    | D21089   | 156  | [140, 170]  | 81   | [61, >360]   | 94  | [85, 249]  | xeroderma pigmentosum, complementation group C                   |
| 32674_at   | D83032   | 132  | [99, >360]  | 88   | [72, 171]    | 94  | [74, 101]  | nuclear protein                                                  |
| 33258_g_at | D26535   | >360 | [>360]      | 82   | [71, 114]    | 94  | [66, 135]  | dihydrolipoamide S-succinyltransferase                           |
| 38290_at   | AF037195 | >360 | [99, >360]  | >360 | [119, >360]  | 94  | [68, 145]  | regulator of G-protein signalling 14                             |
| 38075_at   | X68194   | >360 | [108, >360] | >360 | [69, >360]   | 95  | [74, >360] | synaptophysin-like protein                                       |
| 38113_at   | AB018339 | 170  | [99, >360]  | 147  | [57, >360]   | 95  | [89, 102]  |                                                                  |
| 38695_at   | AA203303 | >360 | [>360]      | 79   | [64, 101]    | 95  | [73, >360] | NADH dehydrogenase (ubiquinone)                                  |
| 39377_at   | D87453   | >360 | [>360]      | 182  | [128, >360]  | 95  | [76, 176]  | mitochondrial ribosomal protein S27                              |
| 33444_at   | D30756   | >360 | [115, >360] | 125  | [87, >360]   | 96  | [87, >360] | membrane component, chromosome 17, surface marker 2              |
| 36322_at   | AB012668 | >360 | [120, >360] | >360 | [>360] >360] | 96  | [86, 112]  | fucosyltransferase 7 (alpha (1,3) fucosyltransferase)            |
| 38303_at   | AB001523 | >360 | [217, >360] | 94   | [73, 115]    | 96  | [71, >360] | transmembrane protein 1                                          |
| 41758_at   | AL096879 | >360 | [117, >360] | 86   | [66, >360]   | 96  | [75, 131]  | chromosome 22 open reading frame 5                               |
| 746_at     | D50640   | >360 | [326, >360] | 73   | [59, >360]   | 96  | [78, >360] |                                                                  |
| 1794_at    | M92287   | 213  | [121, >360] | >360 | [148, >360]  | 100 | [74, 176]  | cyclin D3                                                        |
| 41474_at   | Y08319   | 253  | [115, >360] | 75   | [67, >360]   | 100 | [61, >360] | kinesin heavy chain member 2                                     |
| 172_at     | U57650   | >360 | [202, >360] | 116  | [98, >360]   | 101 | [91, >360] | inositol polyphosphate-5-phosphatase, 145kD                      |
| 39993_at   | D11466   | 341  | [110, >360] | 109  | [88, >360]   | 101 | [72, >360] | phosphatidylinositol glycan, class A isoform 1                   |
| 41177_at   | AW024285 | >360 | [144, >360] | 114  | [100, 129]   | 101 | [88, 133]  | hypothetical protein FLJ12443                                    |
| 35221_at   | X91648   | >360 | [108, >360] | 108  | [77, >360]   | 103 | [98, 347]  |                                                                  |
| 40070_at   | D50912   | 144  | [112, 157]  | >360 | [71, >360]   | 103 | [60, 151]  | RNA binding motif protein 10                                     |
| 34830_at   | W25986   | >360 | [>360]      | 158  | [95, >360]   | 104 | [84, >360] | hypothetical protein DKFZp564K0822                               |
| 38662_at   | AL047596 | >360 | [327, >360] | 116  | [93, >360]   | 106 | [80, >360] | capicua (Drosophila) homolog                                     |

|            |             |      |             |        |             |        |             |                                                                     |
|------------|-------------|------|-------------|--------|-------------|--------|-------------|---------------------------------------------------------------------|
| 32085_at   | AB023198    | >360 | [153, >360] | 106    | [74, >360]  | 108    | [65, >360]  |                                                                     |
| 32119_at   | AL049423    | >360 | [>360]      | 96     | [84, >360]  | 108    | [102, 114]  |                                                                     |
| 35187_at   | AL080216    | >360 | [124, >360] | 128    | [93, >360]  | 108    | [92, 158]   |                                                                     |
| 39137_at   | X80878      | 227  | [189, >360] | 127    | [66, >360]  | 108    | [89, >360]  | nuclear factor related to kappa B binding protein                   |
| 37438_at   | AB007879    | >360 | [236, >360] | >360   | [172, >360] | 109    | [92, >360]  | KIAA0419 gene product                                               |
| 37532_at   | M91432      | 297  | [150, >360] | 95     | [78, 205]   | 109    | [105, 118]  |                                                                     |
| 39147_g_at | U72936      | >360 | [>360]      | 120    | [99, >360]  | 109    | [102, 146]  | transcriptional regulator ATRX                                      |
| 1361_at    | U40705      | 141  | [119, >360] | 139    | [120, 313]  | 110    | [99, 132]   | telomeric repeat binding factor 1, isoform 1                        |
| 31638_at   | AC005329    | >360 | [247, >360] | 135    | [77, >360]  | 111    | [66, >360]  | NADH dehydrogenase (ubiquinone)                                     |
| 35872_at   | D50640      | >360 | [>360]      | 94     | [78, 108]   | 112    | [92, >360]  |                                                                     |
| 33238_at   | U23852      | >360 | [176, >360] | >360   | [105, >360] | 115    | [94, 157]   |                                                                     |
| 37266_at   | U69645      | >360 | [131, >360] | 203    | [95, >360]  | 116    | [74, >360]  |                                                                     |
| 38768_at   | X96752      | >360 | [>360]      | 130    | [109, 151]  | 118    | [106, >360] | L-3-hydroxyacyl-Coenzyme A dehydrogenase, short chain               |
| 32655_s_at | X87613      | >360 | [>360]      | 150    | [107, >360] | 119    | [112, 127]  | thyroid hormone receptor coactivating protein                       |
| 1012_at    | U57317      | >360 | [209, >360] | Absent |             | Absent |             | p300/CBP-associated factor                                          |
| 1108_s_at  | M18391      | 283  | [87, >360]  | Absent |             | Absent |             | EphA1                                                               |
| 1220_g_at  | X15949      | >360 | [>360]      | Absent |             | Absent |             | interferon regulatory factor 2                                      |
| 1255_g_at  | L36861      | >360 | [111, >360] | Absent |             | Absent |             | guanylate cyclase activator 1A (retina)                             |
| 1300_at    | Y08837      | >360 | [180, >360] | Absent |             | Absent |             | X-ray repair cross complementing protein 2                          |
| 1339_s_at  | X14675      | 137  | [94, >360]  | Absent |             | Absent |             |                                                                     |
| 1464_at    | S73149      | 170  | [136, >360] | Absent |             | Absent |             |                                                                     |
| 1488_at    | L77886      | 302  | [131, >360] | Absent |             | Absent |             | protein tyrosine phosphatase, receptor type, K                      |
| 1919_at    | X16316      | >360 | [>360]      | Absent |             | Absent |             | vav 1 oncogene                                                      |
| 1954_at    | AF035121    | 225  | [155, >360] | Absent |             | Absent |             | kinase insert domain receptor (a type III receptor tyrosine kinase) |
| 1997_s_at  | U19599      | >360 | [325, >360] | Absent |             | Absent |             | BCL2-associated X protein                                           |
| 2004_at    | U29671      | 141  | [74, >360]  | Absent |             | Absent |             |                                                                     |
| 210_at     | M95678      | >360 | [>360]      | Absent |             | Absent |             | phospholipase C, beta 2                                             |
| 303_at     | HG960-HT960 | >360 | [158, >360] | Absent |             | Absent |             |                                                                     |
| 31392_r_at | U88965      | >360 | [183, >360] | Absent |             | Absent |             | chromosome 1 open reading frame 1                                   |
| 31517_f_at | M90355      | 174  | [123, >360] | Absent |             | Absent |             |                                                                     |
| 31528_f_at | Z83738      | >360 | [>360]      | Absent |             | Absent |             | H2B histone family, member E                                        |
| 31776_at   | AI446234    | >360 | [233, >360] | Absent |             | Absent |             |                                                                     |
| 318_at     | Y14155      | >360 | [16, >360]  | Absent |             | Absent |             |                                                                     |
| 31881_at   | D64142      | >360 | [30, >360]  | Absent |             | Absent |             | H1 histone family, member X                                         |
| 31927_s_at | D86062      | 223  | [52, >360]  | Absent |             | Absent |             | chromosome 21 open reading frame 33                                 |
| 32158_at   | U53174      | >360 | [>360]      | Absent |             | Absent |             | RAD9 homolog (S. pombe)                                             |
| 32184_at   | X61118      | >360 | [128, >360] | Absent |             | Absent |             | LIM domain only 2                                                   |
| 32202_at   | U67322      | >360 | [>360]      | Absent |             | Absent |             | HBV associated factor, isoform 1                                    |
| 32207_at   | M64925      | 229  | [157, >360] | Absent |             | Absent |             | palmitoylated membrane protein 1                                    |
| 32246_g_at | AF014837    | >360 | [334, >360] | Absent |             | Absent |             | putative methyltransferase                                          |
| 32267_at   | X78933      | >360 | [134, >360] | Absent |             | Absent |             | zinc finger protein HZF10                                           |
| 32538_at   | S95936      | 228  | [89, >360]  | Absent |             | Absent |             | transferrin precursor                                               |
| 32565_at   | U66619      | >360 | [>360]      | Absent |             | Absent |             | SWI/SNF related, subf                                               |
| 32596_at   | W25828      | >360 | [188, >360] | Absent |             | Absent |             | retinoblastoma-like 2 (p130)                                        |
| 32630_f_at | Y07827      | >360 | [273, >360] | Absent |             | Absent |             | butyrophilin, subfamily 3, member A1                                |
| 32676_at   | M93405      | >360 | [>360]      | Absent |             | Absent |             | aldehyde dehydrogenase 6 family, member A1                          |

|            |          |      |             |        |        |                                                                     |
|------------|----------|------|-------------|--------|--------|---------------------------------------------------------------------|
| 33185_at   | AB018304 | >360 | [138, >360] | Absent | Absent | KIAA0761 protein                                                    |
| 33256_at   | Y14494   | 274  | [108, >360] | Absent | Absent | solute carrier family 25 (mitochondrial carrier, Aralar), member 12 |
| 33278_at   | AC004381 | >360 | [108, >360] | Absent | Absent |                                                                     |
| 33410_at   | S66213   | >360 | [92, >360]  | Absent | Absent | integrin alpha chain, alpha 6                                       |
| 33427_s_at | AF106861 | >360 | [179, >360] | Absent | Absent | attractin                                                           |
| 33469_r_at | X68679   | >360 | [117, >360] | Absent | Absent | complement factor H related 3                                       |
| 336_at     | X16576   | 262  | [74, >360]  | Absent | Absent | zinc finger protein 46 (KUP)                                        |
| 33616_at   | D38081   | >360 | [>360]      | Absent | Absent | thromboxane A2 receptor                                             |
| 33707_at   | AF058921 | >360 | [>360]      | Absent | Absent | phospholipase A2, group IVC (cytosolic, calcium-independent)        |
| 33736_at   | Y16522   | 273  | [42, >360]  | Absent | Absent | stomatin (EBP72)-like 1                                             |
| 33749_at   | AB007455 | >360 | [>360]      | Absent | Absent | TP53 target gene 1                                                  |
| 33850_at   | W28892   | 272  | [118, >360] | Absent | Absent | putative translation initiation factor                              |
| 33914_r_at | D00726   | 141  | [81, >360]  | Absent | Absent | ferrochelatase                                                      |
| 33922_at   | U17838   | >360 | [286, >360] | Absent | Absent | PR domain containing 2, with ZNF domain                             |
| 34001_at   | AF033199 | >360 | [158, >360] | Absent | Absent |                                                                     |
| 34028_at   | U55312   | >360 | [190, >360] | Absent | Absent |                                                                     |
| 34217_at   | AB015132 | >360 | [200, >360] | Absent | Absent | Kruppel-like factor 7 (ubiquitous)                                  |
| 34249_at   | AF084535 | >360 | [106, >360] | Absent | Absent | epilepsy, progressive myoclonus type 2, Lafora disease (laforin)    |
| 34416_at   | X57110   | >360 | [121, >360] | Absent | Absent | Cas-Br-M (murine) ecotropic retroviral transforming sequence        |
| 34498_at   | D89974   | >360 | [299, >360] | Absent | Absent | vanin 2, isoform 1 precursor                                        |
| 34560_at   | Z18954   | >360 | [302, >360] | Absent | Absent | S100 calcium-binding protein A5                                     |
| 34568_at   | X82634   | >360 | [196, >360] | Absent | Absent | type I hair keratin 3B                                              |
| 34619_at   | X72925   | >360 | [131, >360] | Absent | Absent |                                                                     |
| 34689_at   | AJ243797 | >360 | [129, >360] | Absent | Absent | three prime repair exonuclease 1                                    |
| 34732_at   | X65873   | >360 | [1, >360]   | Absent | Absent | kinesin family member 5B                                            |
| 34738_at   | L11931   | 195  | [107, >360] | Absent | Absent | serine hydroxymethyltransferase 1 (soluble)                         |
| 34790_at   | S70154   | >360 | [54, >360]  | Absent | Absent | acetyl-Coenzyme A acetyltransferase 2                               |
| 34914_at   | U94778   | >360 | [>360]      | Absent | Absent | proline-serine-threonine phosphatase interacting protein 1          |
| 34956_at   | T77051   | 250  | [166, >360] | Absent | Absent |                                                                     |
| 35019_at   | AF054180 | >360 | [53, >360]  | Absent | Absent | zinc finger protein 254                                             |
| 35283_at   | H05692   | >360 | [28, >360]  | Absent | Absent | hypothetical protein FLJ10738                                       |
| 35288_at   | AB007884 | >360 | [78, >360]  | Absent | Absent | Cdc42 guanine exchange factor 9                                     |
| 35409_r_at | X16281   | 151  | [121, >360] | Absent | Absent |                                                                     |
| 35454_at   | AB007919 | 201  | [92, >360]  | Absent | Absent | KIAA0450 gene product                                               |
| 35492_at   | AC004523 | >360 | [212, >360] | Absent | Absent | cytochrome P450 isoform 4F12                                        |
| 35532_i_at | AJ001683 | >360 | [121, >360] | Absent | Absent | killer cell lectin-like receptor subfamily C, member 4              |
| 35575_f_at | AI698340 | >360 | [>360]      | Absent | Absent | DNA-binding protein                                                 |
| 356_at     | D21089   | 314  | [132, >360] | Absent | Absent | xeroderma pigmentosum, complementation group C                      |
| 35647_at   | U20536   | >360 | [52, >360]  | Absent | Absent | caspase 6, isoform beta                                             |
| 35662_at   | AB017430 | >360 | [>360]      | Absent | Absent | kinesin-like 4                                                      |
| 35710_s_at | U95006   | >360 | [>360]      | Absent | Absent |                                                                     |
| 35763_at   | AB011112 | >360 | [>360]      | Absent | Absent |                                                                     |
| 35775_at   | AF070592 | >360 | [>360]      | Absent | Absent |                                                                     |
| 35913_at   | U88047   | >360 | [98, >360]  | Absent | Absent | dead ringer-like 1                                                  |
| 35922_at   | Y08982   | 139  | [51, >360]  | Absent | Absent | synaptonemal complex protein 2                                      |
| 35958_at   | AL050379 | >360 | [310, >360] | Absent | Absent |                                                                     |
| 35978_at   | AF009242 | 267  | [127, >360] | Absent | Absent | proline-rich Gla (G-carboxyglutamic acid) polypeptide 1             |

|            |          |      |             |        |        |                                                                        |
|------------|----------|------|-------------|--------|--------|------------------------------------------------------------------------|
| 35980_at   | AB011153 | >360 | [45, >360]  | Absent | Absent | phospholipase C, beta 1(phosphoinositide-specific)                     |
| 36330_at   | Y17448   | >360 | [82, >360]  | Absent | Absent | cytoplasmic cysteine conjugate-beta lyase                              |
| 36345_g_at | U34038   | >360 | [62, >360]  | Absent | Absent | coagulation factor II (thrombin) receptor-like 1 precursor             |
| 364_s_at   | AB011542 | >360 | [300, >360] | Absent | Absent |                                                                        |
| 36488_at   | D87469   | 347  | [86, >360]  | Absent | Absent | cadherin EGF LAG seven-pass G-type receptor 2                          |
| 36499_at   | Z16411   | 126  | [104, >360] | Absent | Absent | phospholipase C, beta 3 (phosphatidylinositol-specific)                |
| 36598_s_at | L36818   | >360 | [275, >360] | Absent | Absent | inositol polyphosphate phosphatase-like 1                              |
| 36630_at   | Z50781   | >360 | [>360]      | Absent | Absent | delta sleep inducing peptide, immunoreactor                            |
| 36713_at   | AL080170 | 245  | [106, >360] | Absent | Absent |                                                                        |
| 36737_at   | U59057   | >360 | [290, >360] | Absent | Absent | crystallin, beta A4                                                    |
| 36794_at   | X16282   | >360 | [159, >360] | Absent | Absent |                                                                        |
| 36820_r_at | S75313   | 157  | [64, >360]  | Absent | Absent | ataxin 3, isoform 1                                                    |
| 36941_at   | U16954   | 189  | [59,v 195]  | Absent | Absent | AF1Q protein                                                           |
| 37098_at   | D38537   | >360 | [>360]      | Absent | Absent | protoporphyrinogen oxidase                                             |
| 37157_at   | X56667   | >360 | [137, >360] | Absent | Absent | calbindin 2, full length protein isoform                               |
| 37199_at   | AI760932 | >360 | [>360]      | Absent | Absent | CGI-60 protein                                                         |
| 372_f_at   | X90392   | >360 | [192, >360] | Absent | Absent | deoxyribonuclease I-like 1                                             |
| 37214_g_at | Z84718   | >360 | [>360]      | Absent | Absent |                                                                        |
| 37437_at   | AB011162 | >360 | [212, >360] | Absent | Absent | KIAA0590 gene product                                                  |
| 37443_at   | AL031588 | 246  | [50, >360]  | Absent | Absent | G-2 and S-phase expressed 1                                            |
| 37468_at   | AF058925 | 124  | [57, >360]  | Absent | Absent | Janus kinase 2                                                         |
| 37472_at   | U60337   | >360 | [285, >360] | Absent | Absent | mannosidase, beta A, lysosomal                                         |
| 37476_at   | AA650210 | >360 | [209, >360] | Absent | Absent | TRIAD3 protein                                                         |
| 37556_at   | M81637   | >360 | [58, >360]  | Absent | Absent | grancalcin, EF-hand calcium binding protein                            |
| 37584_at   | AJ007669 | >360 | [>360]      | Absent | Absent | X-ray repair complementing defective repair in Chinese hamster cells 9 |
| 37764_at   | D87328   | >360 | [68, >360]  | Absent | Absent | holocarboxylase synthetase                                             |
| 37788_at   | AF052115 | >360 | [296, >360] | Absent | Absent |                                                                        |
| 37825_at   | M84443   | >360 | [61, >360]  | Absent | Absent | galactokinase 2                                                        |
| 37827_r_at | AJ237839 | >360 | [43, >360]  | Absent | Absent | chromosome 21 open reading frame 5                                     |
| 37857_at   | AL080188 | >360 | [251, >360] | Absent | Absent |                                                                        |
| 38020_at   | AB014552 | 155  | [65, >360]  | Absent | Absent | KIAA0652 gene product                                                  |
| 38034_at   | M16505   | 126  | [42, >360]  | Absent | Absent | steroid sulfatase (microsomal), arylsulfatase C, isozyme S             |
| 38162_at   | AF007156 | 353  | [78, >360]  | Absent | Absent | KIAA0751 gene product                                                  |
| 38247_at   | U67058   | 296  | [34, >360]  | Absent | Absent |                                                                        |
| 38406_f_at | AI207842 | >360 | [251, >360] | Absent | Absent | prostaglandin D2 synthase (21kD, brain)                                |
| 38507_at   | X16867   | >360 | [326, >360] | Absent | Absent |                                                                        |
| 38546_at   | AB006537 | 122  | [17, >360]  | Absent | Absent | interleukin 1 receptor accessory protein                               |
| 38637_at   | L16895   | >360 | [118, >360] | Absent | Absent | lysyl oxidase                                                          |
| 38639_at   | AF040963 | >360 | [269, >360] | Absent | Absent | Mad4                                                                   |
| 38645_at   | AL096748 | >360 | [>360]      | Absent | Absent | DKFZP434A043 protein                                                   |
| 38785_at   | X52228   | >360 | [>360]      | Absent | Absent | mucin 1, transmembrane                                                 |
| 38799_at   | AF068706 | >360 | [>360]      | Absent | Absent | adaptor-related protein complex 1, gamma 2 subunit                     |
| 38888_at   | AF055636 | >360 | [173, >360] | Absent | Absent | leucine-rich, glioma inactivated 1 precursor                           |
| 38948_at   | Y18206   | >360 | [234, >360] | Absent | Absent | protein phosphatase 1, regulatory subunit 3D                           |
| 39068_at   | L76702   | >360 | [123, >360] | Absent | Absent | protein phosphatase 2, regulatory subunit B (B56), delta isoform       |
| 39249_at   | AB001325 | >360 | [185, >360] | Absent | Absent | aquaporin 3                                                            |
| 39350_at   | U50410   | 151  | [146, >360] | Absent | Absent | glypican 3                                                             |



|            |               |      |             |        |        |                                                                            |
|------------|---------------|------|-------------|--------|--------|----------------------------------------------------------------------------|
| 39361_f_at | AF043906      | >360 | [142, >360] | Absent | Absent | transmembrane 4 superfamily member 6                                       |
| 39408_at   | Z80345        | >360 | [106, >360] | Absent | Absent |                                                                            |
| 39534_at   | L77564        | 123  | [51, >360]  | Absent | Absent |                                                                            |
| 39845_at   | AF020760      | >360 | [>360]      | Absent | Absent | protease, serine, 25                                                       |
| 39910_at   | AA663800      | >360 | [255, >360] | Absent | Absent | hypothetical protein                                                       |
| 39968_at   | U50136        | >360 | [>360]      | Absent | Absent |                                                                            |
| 39986_at   | AL050100      | 282  | [110, >360] | Absent | Absent |                                                                            |
| 40102_at   | AB018315      | 122  | [72, >360]  | Absent | Absent | oxysterol-binding protein-like protein 2                                   |
| 40136_at   | AB014576      | >360 | [>360]      | Absent | Absent | KIAA0676 protein                                                           |
| 40266_at   | AB028959      | >360 | [>360]      | Absent | Absent | KIAA1036 protein                                                           |
| 40274_at   | U48213        | >360 | [352, >360] | Absent | Absent |                                                                            |
| 40361_at   | D78333        | 171  | [102, >360] | Absent | Absent | chaperonin containing TCP1, subunit 6B (zeta 2)                            |
| 40381_at   | AB023189      | >360 | [114, >360] | Absent | Absent | KIAA0972 protein                                                           |
| 40386_r_at | M96956        | >360 | [227, >360] | Absent | Absent | teratocarcinoma-derived growth factor 1                                    |
| 40415_at   | X14813        | >360 | [341, >360] | Absent | Absent | acetyl-Coenzyme A acyltransferase 1                                        |
| 40434_at   | U97519        | 196  | [57, >360]  | Absent | Absent | podocalyxin-like                                                           |
| 40455_at   | AB020637      | 126  | [84, 144]   | Absent | Absent |                                                                            |
| 40472_at   | AF007155      | >360 | [260, >360] | Absent | Absent |                                                                            |
| 40575_at   | AB011155      | 248  | [197, >360] | Absent | Absent | discs, large (Drosophila) homolog 5                                        |
| 40672_at   | U57721        | 297  | [138, >360] | Absent | Absent | kynureninase (L-kynurenine hydrolase)                                      |
| 40817_at   | M96824        | >360 | [>360]      | Absent | Absent | nucleobindin 1                                                             |
| 40976_at   | AF052432      | >360 | [257, >360] | Absent | Absent | katanin p80 subunit B 1                                                    |
| 41002_at   | U59299        | >360 | [>360]      | Absent | Absent | solute carrier family 16 (monocarboxylic acid transporters), member 5      |
| 41018_at   | AL050015      | 189  | [85, >360]  | Absent | Absent | DKFZP564O243 protein                                                       |
| 41083_at   | AC006276      | >360 | [>360]      | Absent | Absent |                                                                            |
| 41106_at   | AF022797      | >360 | [>360]      | Absent | Absent | K <sup>+</sup> conductance calcium-activated channel, subfamily N,         |
| 41107_at   | AB002372      | >360 | [165, >360] | Absent | Absent | syntaphilin                                                                |
| 41120_at   | D14686        | >360 | [>360]      | Absent | Absent |                                                                            |
| 41209_at   | M15856        | >360 | [>360]      | Absent | Absent | lipoprotein lipase precursor                                               |
| 41227_at   | AL022162      | >360 | [293, >360] | Absent | Absent | phosphatidylinositol polyphosphate 5-phosphatase, isoform a                |
| 41282_s_at | AA194159      | >360 | [226, >360] | Absent | Absent | peroxisome biogenesis factor 10                                            |
| 41306_at   | AA004795      | 160  | [104, >360] | Absent | Absent | amyloid beta (A4) precursor protein-binding, family A, member 2, isoform 1 |
| 41378_at   | AF010236      | 220  | [84, >360]  | Absent | Absent |                                                                            |
| 41396_at   | AB006629      | >360 | [311, >360] | Absent | Absent | cytoplasmic linker 2, isoform 1                                            |
| 41590_at   | AI652660      | >360 | [226, >360] | Absent | Absent | CGI-87 protein                                                             |
| 41871_at   | AI660929      | 150  | [120, >360] | Absent | Absent | lung type-I cell membrane-associated glycoprotein, isoform 2 precursor     |
| 732_f_at   | HG2148-HT2218 | >360 | [76, >360]  | Absent | Absent |                                                                            |
| 748_s_at   | D63940        | 196  | [106, >360] | Absent | Absent | MAX interacting protein 1                                                  |
| 936_s_at   | HG3570-HT3773 | >360 | [>360]      | Absent | Absent |                                                                            |

**Supplemental Table 6. Short half-life transcripts that contain ARE-like sequence elements.**

The transcripts shown had half-lives less than 60 min in either the Media condition, CD3 or CD3+ CD28 condition, and were identified through the overlap of Accession numbers between our dataset and the ARE database.

| Probe      | Accession No. | MEDIA                            | $\alpha$ CD3                     | $\alpha$ CD3+ $\alpha$ CD28      | Description                                                                         |
|------------|---------------|----------------------------------|----------------------------------|----------------------------------|-------------------------------------------------------------------------------------|
|            |               | Half-life [95% C.I.]<br>(in min) | Half-life [95% C.I.]<br>(in min) | Half-life [95% C.I.]<br>(in min) |                                                                                     |
| 32669_at   | U07563        | 51 [16,>360]                     | Absent                           | 11 [1,49]                        | homolog of Yeast RRP4 (ribosomal RNA processing 4), 3'-5'-exoribonuclease           |
| 35659_at   | L76259        | 25 [22,>360]                     | 12 [1,>360]                      | 12 [1,>360]                      | 6-pyruvoyltetrahydropterin synthase                                                 |
| 33705_at   | AB007939      | 18 [9,82]                        | 15 [1,27]                        | 17 [1,22]                        | KIAA0470 gene product                                                               |
| 41779_at   | AB014569      | Absent                           | 17 [1,28]                        | 17 [1,30]                        | KIAA0669 gene product                                                               |
| 1237_at    | S81914        | >360 [211,>360]                  | 25 [7,37]                        | 20 [2,32]                        | immediate early response 3                                                          |
| 37312_at   | L04510        | 43 [29,111]                      | 31 [20,43]                       | 24 [2,42]                        | ADP-ribosylation factor domain protein 1, 64kD                                      |
| 1461_at    | M69043        | 32 [29,49]                       | 25 [21,34]                       | 25 [21,33]                       | nuclear factor of kappa light polypeptide gene enhancer in B-cells inhibitor, alpha |
| 279_at     | L13740        | Absent                           | 25 [22,32]                       | 25 [15,43]                       | nuclear receptor subfamily 4, group A, member 1                                     |
| 280_g_at   | L13740        | Absent                           | 25 [22,29]                       | 25 [22,31]                       | nuclear receptor subfamily 4, group A, member 1                                     |
| 1635_at    | U07563        | 108 [73,>360]                    | 46 [26,>360]                     | 26 [22,53]                       | v-abl Abelson murine leukemia viral oncogene homolog 1                              |
| 40448_at   | S78234        | 42 [35,>360]                     | 27 [17,36]                       | 26 [17,46]                       | cell division cycle 27                                                              |
| 36402_at   | AB018254      | 25 [15,57]                       | 18 [1,50]                        | 28 [2,43]                        | KIAA0711 gene product                                                               |
| 37310_at   | U80017        | 336 [76,>360]                    | 38 [24,73]                       | 29 [20,47]                       | survival of motor neuron 1, telomeric                                               |
| 1061_at    | U00672        | 32 [29,>360]                     | 37 [15,>360]                     | 31 [17,53]                       | interleukin 10 receptor, alpha                                                      |
| 1852_at    | X02910        | >360 [68,>360]                   | 25 [15,31]                       | 31 [17,42]                       | tumor necrosis factor (TNF superfamily, member 2)                                   |
| 39695_at   | AB014528      | 36 [29,55]                       | 32 [23,52]                       | 32 [25,48]                       | KIAA0628 gene product                                                               |
| 41789_r_at | D50487        | >360 [30,>360]                   | 39 [33,47]                       | 33 [9,53]                        | DEAD/H (Asp-Glu-Ala-Asp/His) box polypeptide 8 (RNA helicase)                       |
| 1062_g_at  | U00672        | 37 [29,48]                       | 41 [29,53]                       | 34 [29,48]                       | interleukin 10 receptor, alpha                                                      |
| 40659_at   | X77922        | Absent                           | 31 [16,48]                       | 34 [29,48]                       | sialyltransferase 8A                                                                |
| 237_s_at   | M60483        | 39 [29,103]                      | 52 [37,64]                       | 35 [29,42]                       | protein phosphatase 2 (formerly 2A), catalytic subunit, alpha isoform               |
| 259_s_at   | M16441        | Absent                           | 29 [8,36]                        | 36 [22,47]                       | tumor necrosis factor (TNF superfamily, member 2)                                   |
| 39703_at   | X16396        | 34 [22,>360]                     | 44 [16,64]                       | 37 [2,50]                        | methylene THF dehydrogenase (NAD+ dependent)                                        |
| 40516_at   | U12767        | 40 [34,73]                       | 46 [43,49]                       | 38 [23,61]                       | nuclear receptor subfamily 4, group A, member 3                                     |
| 41447_at   | AB014569      | 46 [31,>360]                     | 32 [29,39]                       | 38 [29,43]                       | KIAA0669 gene product                                                               |
| 1401_g_at  | M13207        | Absent                           | 18 [10,22]                       | 39 [33,43]                       | colony stimulating factor 2 (granulocyte-macrophage)                                |
| 35681_r_at | AB020700      | Absent                           | 33 [22,71]                       | 39 [13,>360]                     | KIAA0893 protein                                                                    |
| 38822_at   | AB023188      | 46 [43,49]                       | 44 [31,56]                       | 39 [30,43]                       | KIAA0971 protein                                                                    |
| 40099_at   | M92843        | 87 [71,137]                      | 41 [36,60]                       | 39 [29,75]                       | zinc finger protein 36, C3H type, homolog (mouse)                                   |
| 40661_at   | U51166        | Absent                           | 38 [29,48]                       | 39 [30,44]                       | thymine-DNA glycosylase                                                             |
| 41215_s_at | AB023207      | >360 [57,>360]                   | 39 [36,46]                       | 39 [31,49]                       | carbohydrate (chondroitin) synthase 1                                               |
| 806_at     | U56998        | 68 [45,>360]                     | 46 [43,56]                       | 39 [36,49]                       | putative serine/threonine protein kinase PRK                                        |
| 38526_at   | AF045451      | 52 [36,187]                      | 112 [57,>360]                    | 40 [30,72]                       | NGFI-A binding protein 1 (EGR1 binding protein 1)                                   |
| 41384_at   | AI452442      | Absent                           | 10 [1,>360]                      | 40 [1,>360]                      | KIAA0669 gene product                                                               |
| 35074_at   | AB011141      | 38 [29,>360]                     | Absent                           | 44 [23,50]                       | zinc finger homeobox 1b                                                             |
| 1400_at    | M13207        | Absent                           | 24 [15,33]                       | 45 [16,74]                       | colony stimulating factor 2 (granulocyte-macrophage)                                |

|            |          |        |            |         |           |         |                                                                                      |                                                                                      |
|------------|----------|--------|------------|---------|-----------|---------|--------------------------------------------------------------------------------------|--------------------------------------------------------------------------------------|
| 190_at     | U12767   | Absent | 40         | [29,53] | 45        | [36,51] | nuclear receptor subfamily 4, group A, member 3                                      |                                                                                      |
| 32541_at   | X97544   | 43     | [29,224]   | 33      | [23,43]   | 45      | [36,50]                                                                              | translocase of inner mitochondrial membrane 17 homolog A (yeast)                     |
| 38692_at   | X59739   | >360   | [85,>360]  | 42      | [36,59]   | 45      | [36,57]                                                                              | zinc finger protein, X-linked                                                        |
| 40570_at   | D78579   | 48     | [40,58]    | 45      | [35,53]   | 45      | [34,51]                                                                              | nuclear receptor subfamily 4, group A, member 3                                      |
| 33439_at   | U47741   | 81     | [43,>360]  | 55      | [32,>360] | 46      | [8,>360]                                                                             | CREB binding protein (Rubinstein-Taybi syndrome)                                     |
| 37537_at   | X63717   | 44     | [28,>360]  | 35      | [29,53]   | 46      | [43,53]                                                                              | tumor necrosis factor receptor superfamily, member 6                                 |
| 38218_at   | U02882   | Absent | Absent     | [1,69]  | 46        | [8,53]  | phosphodiesterase 4D, cAMP-specific (phosphodiesterase E3 dunce homolog, Drosophila) |                                                                                      |
| 40101_g_at | L19872   | >360   | [128,>360] | 66      | [51,77]   | 46      | [37,>360]                                                                            | aryl hydrocarbon receptor                                                            |
| 40678_at   | X95525   | >360   | [41,>360]  | 167     | [85,>360] | 46      | [31,356]                                                                             | TAF5 RNA polymerase II, TATA box binding protein (TBP)-associated factor, 100 kD     |
| 40865_at   | D13891   | 48     | [38,251]   | 38      | [29,74]   | 46      | [37,76]                                                                              | inhibitor of DNA binding 2, dominant negative helix-loop-helix protein               |
| 33421_s_at | L20971   | Absent | Absent     | 34      | [4,>360]  | 47      | [31,98]                                                                              | phosphodiesterase 4B, cAMP-specific (phosphodiesterase E4 dunce homolog, Drosophila) |
| 40662_g_at | U41816   | Absent | Absent     | 44      | [33,55]   | 47      | [43,56]                                                                              | prefoldin 4                                                                          |
| 143_s_at   | U75309   | 67     | [37,>360]  | 29      | [2,>360]  | 48      | [23,>360]                                                                            | TAF5 RNA polymerase II, TATA box binding protein (TBP)-associated factor, 100 kD     |
| 39604_at   | AF000982 | 43     | [26,>360]  | 47      | [36,61]   | 48      | [29,63]                                                                              | asparagine synthetase                                                                |
| 40074_at   | AF000367 | >360   | [34,>360]  | 40      | [33,49]   | 49      | [36,62]                                                                              | CDC14 cell division cycle 14 homolog A ( <i>S. cerevisiae</i> )                      |
| 744_at     | D50487   | >360   | [63,>360]  | 80      | [54,>360] | 49      | [30,>360]                                                                            | RNA helicase (HRH1)                                                                  |
| 36926_at   | M20681   | 39     | [35,>360]  | 41      | [24,60]   | 50      | [30,63]                                                                              | solute carrier family 2 (facilitated glucose transporter), member 3                  |
| 37643_at   | AF002697 | >360   | [52,>360]  | 54      | [39,>360] | 50      | [41,56]                                                                              | BCL2/adenovirus E1B 19kD interacting protein 3                                       |
| 41788_i_at | L06797   | 105    | [22,>360]  | 43      | [22,55]   | 50      | [26,88]                                                                              | chemokine (C-X-C motif), receptor 4 (fusin)                                          |
| 649_s_at   | U50553   | 43     | [36,50]    | 45      | [36,49]   | 50      | [36,56]                                                                              | asparagine synthetase                                                                |
| 1102_s_at  | M10901   | 49     | [43,130]   | 50      | [37,65]   | 51      | [30,69]                                                                              | nuclear receptor subfamily 3, group C, member 1                                      |
| 32111_at   | M80244   | 113    | [37,>360]  | 54      | [50,63]   | 51      | [43,60]                                                                              | solute carrier family 7 (cationic amino acid transporter, y+ system), member 5       |
| 37272_at   | D50917   | 59     | [50,>360]  | 51      | [36,75]   | 51      | [36,73]                                                                              | transcriptional regulator interacting with the PHS-bromodomain 2                     |
| 36453_at   | M10901   | >360   | [184,>360] | 66      | [44,>360] | 52      | [31,>360]                                                                            | nuclear receptor subfamily 3, group C, member 1                                      |
| 37313_at   | X95263   | 42     | [33,>360]  | 35      | [29,82]   | 52      | [43,74]                                                                              | PWP2 periodic tryptophan protein homolog (yeast)                                     |
| 39744_at   | AB014551 | 83     | [55,>360]  | 55      | [40,>360] | 52      | [44,56]                                                                              | rho/rac guanine nucleotide exchange factor (GEF) 2                                   |
| 1479_g_at  | L10717   | 48     | [43,>360]  | 57      | [45,81]   | 53      | [42,66]                                                                              | IL2-inducible T-cell kinase                                                          |
| 32026_s_at | AF048732 | >360   | [76,>360]  | 53      | [38,75]   | 53      | [46,62]                                                                              | cyclin T2                                                                            |
| 34370_at   | AI970189 | 89     | [62,>360]  | 45      | [34,73]   | 53      | [43,62]                                                                              | Homo sapiens cDNA FLJ31348 fis, clone MESAN2000026                                   |
| 35720_at   | AB020651 | 115    | [43,>360]  | 50      | [37,63]   | 53      | [37,68]                                                                              | KIAA0844 protein                                                                     |
| 36690_at   | X80692   | 59     | [50,128]   | 47      | [40,81]   | 53      | [40,74]                                                                              | mitogen-activated protein kinase 6                                                   |
| 41050_at   | AF117829 | 64     | [45,100]   | 66      | [44,97]   | 53      | [27,76]                                                                              | receptor-interacting serine-threonine kinase 2                                       |
| 39299_at   | AF000993 | >360   | [175,>360] | 74      | [36,>360] | 55      | [34,>360]                                                                            | ubiquitously transcribed tetratricopeptide repeat gene, X chromosome                 |
| 31854_at   | AF035582 | 106    | [56,>360]  | 66      | [40,>360] | 56      | [38,79]                                                                              | calcium/calmodulin-dependent serine protein kinase (MAGUK family)                    |
| 31854_at   | AB002311 | 106    | [56,>360]  | 66      | [40,>360] | 56      | [38,79]                                                                              | PDZ domain containing guanine nucleotide exchange factor(GEF)1                       |
| 38010_at   | AF042378 | 125    | [93,>360]  | 50      | [36,>360] | 56      | [50,95]                                                                              | spindle pole body protein                                                            |
| 38669_at   | AB011420 | 46     | [32,>360]  | 32      | [29,95]   | 57      | [50,70]                                                                              | serine/threonine kinase 17a (apoptosis-inducing)                                     |
| 34446_at   | D84145   | 163    | [67,>360]  | 67      | [36,>360] | 59      | [36,>360]                                                                            | novel RGD-containing protein                                                         |
| 36198_at   | AL096747 | 72     | [57,91]    | 60      | [50,>360] | 59      | [42,84]                                                                              | hypothetical gene DKFZp570I0164                                                      |
| 37555_at   | AB002303 | 110    | [85,>360]  | 54      | [50,70]   | 59      | [47,91]                                                                              | endosome-associated FYVE-domain protein                                              |
| 38931_at   | AF068836 | 37     | [29,>360]  | 51      | [18,>360] | 59      | [50,63]                                                                              | pleckstrin homology, Sec7 and coiled/coil domains, binding protein                   |
| 38931_at   | M31516   | 37     | [29,>360]  | 51      | [18,>360] | 59      | [50,63]                                                                              | decay accelerating factor for complement (CD55, Cromer blood group system)           |
| 595_at     | U56998   | >360   | [79,>360]  | 60      | [32,90]   | 59      | [36,161]                                                                             | cytokine-inducible kinase                                                            |

|            |          |        |            |        |            |        |            |        |            |                                                                                             |
|------------|----------|--------|------------|--------|------------|--------|------------|--------|------------|---------------------------------------------------------------------------------------------|
| 32186_at   | AB026118 | 41     | [29,>360]  | 59     | [47,77]    | 60     | [47,73]    | 60     | [47,73]    | mucosa associated lymphoid tissue lymphoma translocation gene 1                             |
| 33831_at   | D31797   | 74     | [51,>360]  | 53     | [44,83]    | 60     | [45,79]    | 60     | [45,79]    | tumor necrosis factor (ligand) superfamily, member 5 (hyper-IgM syndrome)                   |
| 35697_at   | X16983   | Absent |            | 25     | [17,44]    | 60     | [37,>360]  | 60     | [37,>360]  | integrin, alpha 4 (antigen CD49D, alpha 4 subunit of VLA-4 receptor)                        |
| 826_at     | U50553   | 249    | [79,>360]  | 54     | [44,>360]  | 61     | [43,82]    | 61     | [43,82]    | helicase-like protein 2 (DDX14)                                                             |
| 40320_at   | AF032885 | 53     | [50,95]    | 49     | [32,>360]  | 65     | [48,223]   | 65     | [48,223]   | forkhead box O1A (rhabdomyosarcoma)                                                         |
| 32350_at   | S46622   | >360   | [>360]     | 46     | [36,59]    | 66     | [41,104]   | 66     | [41,104]   | protein phosphatase 3 (formerly 2B), catalytic subunit, gamma isoform (calcineurin A gamma) |
| 32350_at   | AB014571 | >360   | [>360]     | 46     | [36,59]    | 66     | [41,104]   | 66     | [41,104]   | likely ortholog of mouse suppressors of cytokine signalling 5                               |
| 1478_at    | L10717   | >360   | [58,>360]  | 58     | [50,70]    | 67     | [59,76]    | 67     | [59,76]    | IL2-inducible T-cell kinase                                                                 |
| 34751_at   | L39060   | >360   | [213,>360] | 54     | [44,63]    | 68     | [51,223]   | 68     | [51,223]   | TATA box binding protein (TBP)-associated factor, RNA polymerase I, A, 48kD                 |
| 37914_at   | M97347   | >360   | [98,>360]  | 52     | [31,>360]  | 68     | [51,>360]  | 68     | [51,>360]  | glucosaminyl (N-acetyl) transferase 1, core 2 (beta-1,6-N-acetylglucosaminyltransferase)    |
| 32055_g_at | AL050164 | Absent |            | Absent |            | 69     | [51,>360]  | 69     | [51,>360]  | chromodomain protein, Y chromosome-like                                                     |
| 35959_at   | U82328   | Absent |            | Absent |            | 69     | [42,>360]  | 69     | [42,>360]  | Pyruvate dehydrogenase complex, lipoyl-containing component X; E3-binding protein           |
| 36296_at   | AF032119 | Absent |            | 41     | [32,>360]  | 69     | [37,>360]  | 69     | [37,>360]  | calcium/calmodulin-dependent serine protein kinase (MAGUK family)                           |
| 1779_s_at  | M16750   | 68     | [52,>360]  | 60     | [40,>360]  | 71     | [37,>360]  | 71     | [37,>360]  | pim-1 oncogene                                                                              |
| 41003_at   | Y16521   | 56     | [43,>360]  | 44     | [31,76]    | 71     | [43,83]    | 71     | [43,83]    | CDP-diacylglycerol synthase (phosphatidate cytidyltransferase) 2                            |
| 1562_g_at  | U27193   | 204    | [36,>360]  | 39     | [22,54]    | 72     | [18,>360]  | 72     | [18,>360]  | dual specificity phosphatase 8                                                              |
| 31847_at   | X59131   | 112    | [66,>360]  | 53     | [40,70]    | 72     | [34,>360]  | 72     | [34,>360]  | highly charged protein                                                                      |
| 33893_r_at | S82692   | >360   | [97,>360]  | 53     | [44,>360]  | 72     | [51,>360]  | 72     | [51,>360]  | interleukin 2                                                                               |
| 33249_at   | AB016247 | 45     | [32,56]    | 68     | [42,>360]  | 74     | [59,91]    | 74     | [59,91]    | sterol-C5-desaturase (ERG3 delta-5-desaturase homolog, fungal)-like                         |
| 34781_at   | AF004715 | 203    | [106,>360] | 53     | [43,>360]  | 78     | [57,>360]  | 78     | [57,>360]  | jerky homolog-like (mouse)                                                                  |
| 36103_at   | D13641   | >360   | [167,>360] | 60     | [37,70]    | 80     | [26,118]   | 80     | [26,118]   | translocase of outer mitochondrial membrane 20 (yeast) homolog                              |
| 36164_at   | D12614   | >360   | [54,>360]  | 54     | [41,154]   | 80     | [58,86]    | 80     | [58,86]    | lymphotoxin alpha (TNF superfamily, member 1)                                               |
| 38353_at   | D86959   | 345    | [84,>360]  | 60     | [37,152]   | 82     | [43,>360]  | 82     | [43,>360]  | Ste20-related serine/threonine kinase                                                       |
| 36979_at   | X02419   | 60     | [50,95]    | 61     | [57,70]    | 88     | [50,>360]  | 88     | [50,>360]  | plasminogen activator, urokinase                                                            |
| 36414_s_at | J04130   | >360   | [48,>360]  | Absent |            | 97     | [58,>360]  | 97     | [58,>360]  | small inducible cytokine A4                                                                 |
| 33316_at   | D15050   | 27     | [22,>360]  | 80     | [63,>360]  | 104    | [54,>360]  | 104    | [54,>360]  | transcription factor 8 (represses interleukin 2 expression)                                 |
| 32829_at   | M16801   | 86     | [72,>360]  | 60     | [50,126]   | 106    | [51,>360]  | 106    | [51,>360]  | nuclear receptor subfamily 3, group C, member 2                                             |
| 41787_at   | M59465   | Absent |            | 53     | [43,69]    | 106    | [56,>360]  | 106    | [56,>360]  | tumor necrosis factor, alpha-induced protein 3                                              |
| 41343_at   | U70426   | >360   | [167,>360] | 60     | [57,>360]  | 123    | [84,>360]  | 123    | [84,>360]  | regulator of G-protein signalling 16                                                        |
| 34021_at   | X81198   | Absent |            | 46     | [36,71]    | 142    | [78,>360]  | 142    | [78,>360]  | archain 1                                                                                   |
| 1538_s_at  | X00695   | Absent |            | 34     | [28,57]    | 150    | [79,>360]  | 150    | [79,>360]  | interleukin 2                                                                               |
| 160025_at  | X70340   | >360   | [130,>360] | 40     | [22,>360]  | 157    | [73,>360]  | 157    | [73,>360]  | transforming growth factor, alpha                                                           |
| 39954_r_at | U72206   | >360   | [72,>360]  | Absent |            | 248    | [72,>360]  | 248    | [72,>360]  | rho/rac guanine nucleotide exchange factor (GEF) 2                                          |
| 36674_at   | U46024   | 40     | [36,>360]  | 198    | [163,>360] | 264    | [142,>360] | 264    | [142,>360] | myotubular myopathy 1                                                                       |
| 33945_at   | D84454   | Absent |            | 187    | [80,>360]  | 327    | [64,>360]  | 327    | [64,>360]  | solute carrier family 35 (UDP-galactose transporter), member 2                              |
| 35731_at   | D90144   | >360   | [205,>360] | 52     | [30,>360]  | 344    | [159,>360] | 344    | [159,>360] | small inducible cytokine A3                                                                 |
| 32975_g_at | AB018351 | Absent |            | Absent |            | >360   | [94,>360]  | >360   | [94,>360]  | KIAA0808 gene product                                                                       |
| 35006_at   | U00672   | 89     | [60,>360]  | Absent |            | >360   | [82,>360]  | >360   | [82,>360]  | interleukin 10 receptor, alpha                                                              |
| 36920_at   | U16954   | >360   | [>360]     | 39     | [36,43]    | >360   | [61,>360]  | >360   | [61,>360]  | ALL1-fused gene from chromosome 1q                                                          |
| 34230_r_at | AL049701 | >360   | [26,>360]  | Absent |            | Absent |            | Absent |            | KIAA0471 gene product                                                                       |
| 36941_at   | X57206   | 189    | [59,195]   | Absent |            | Absent |            | Absent |            | inositol 1,4,5-trisphosphate 3-kinase B                                                     |
| 40591_at   | D78579   | 104    | [50,>360]  | Absent |            | Absent |            | Absent |            | nuclear receptor subfamily 4, group A, member 3                                             |

## Supplemental Statistical Methods

We used a first order decay model to compute the half-lives of transcripts expressed in T cells. Affymetrix software was used to assign hybridization intensities represented by the average difference between the positive match and mismatch probes (the AD) for each time point under each stimulation condition. These AD values were scaled equally across points and normalized to the AD value of GAPDH at time 0 for each experiment. Let  $y_{ijkl}$  = the normalized, scaled AD values at time  $t_{ik}$  for gene  $j$  on experiment  $k$  under the  $l^{\text{th}}$  stimulation condition, where  $i = 1, \dots, I_k$  (the number of points in a given experiment),  $j = 1, \dots, 12,625$  (the number of genes on each microarray),  $k = 1, 2, 3, 4$  and  $l = 1, 2, 3$ . It is customary to model the intensity at a feature on a microarray as a signal that is corrupted by multiplicative error (e.g., Newton, et al. (2001)). The AD values reported by the Affymetrix software are linear combinations of these variables (which are corrupted by multiplicative error), hence the AD is subject to additive error. This additive error becomes clearest when we find (like many others using version 4.0 of the Affymetrix software) that some of these AD values are negative. Moreover, since these AD values are averages the central limit theorem implies the distribution of these quantities is approximately Gaussian. For these reasons, we propose the following model for  $y_{ijkl}$

$$y_{ijkl} = \beta_{0jkl} e^{-\beta_{1j} t_{ik}} + \epsilon_{ijkl}.$$

To use this decay model, 12 observations are used to estimate 6 parameters (the 4 experiment specific intercepts the decay rate and the variance of the errors) for each of the 37,875 separate nonlinear regressions. We here treat each gene as independent of the other genes given the normalization, as is commonly done in the analysis of microarrays (e.g. Dudoit et al. (2002) and Efron (2001)).

Since the sample size is small the usual approximations for the standard errors (based on Gaussian errors and maximum likelihood) of these estimates are not reliable. In addition, estimates based on resampling would be inaccurate since the justification of resampling schemes relies on asymptotic arguments (see, e.g., van der Vaart). Thus, we suppose the parameters are random variables and use Bayesian methods to compute probability intervals (see for example, Box and Tiao 1973, Section 8.2.6). An essential ingredient in the Bayesian approach is a prior distribution for each model parameter. For the standard deviation, we use the usual uniform distribution over the natural parameter space (see for example, Berger (1980)). We use priors that are uniform over the real line for the intercepts as is commonly done in regression models (Berger (1980)), and we use a prior for the half-lives that supposes they are uniform over the range from 1 minute to

10 hours. Since we are primarily interested in inference for the half-lives, we used a vague prior for this parameter, but we could have instead used a vague prior for the decay rate. Since these 2 priors are both reasonable *a priori*, we used both to assess sensitivity of the results to the prior distribution, although the results presented in the manuscript use the vague prior on the half-life scale (since this is the parameter of interest, as discussed in Berger (1980)). The results are not unduly sensitive to the specification of the prior (the correlation of the posterior probabilities of differences in half-lives across conditions from the 2 models exceeds 0.7 for all comparisons).

We find the marginal posterior distribution of the regression parameters (under the assumption of Gaussian error after analytically integrating the error variance out of the posterior distribution) is

$$p(\beta_{0jM}, \beta_{1jM} | y_{ijM} \quad i = 1, \dots, k_I \quad k = 1, \dots, 4) \propto \left( \sum_{k=1}^4 \sum_{i=1}^{I_k} (y_{ijM} - \beta_{0jM} e^{-\beta_{1jM} t_{ik}})^2 \right)^{-0.5}$$

We can then use the posterior distribution of the parameters to construct credible intervals and answer questions we may have about the parameters, such as the marginal probability that different stimulation conditions are associated with different half-lives (these marginal probabilities are what is reported in the body of the manuscript). We can also use the simulations to find the largest possible set of genes so that the joint posterior probability that this set of genes have half-lives that differ across experimental conditions exceeds some value, such as 0.95. This is the usual Bayesian approach to multiple comparisons, see e.g., Meng and Dempster (1987). The latter computation indicates that there are 29 genes that have a half-life that differs across at least one condition. We can also compute these quantities for specific comparisons, such as media compared to stimulation with anti-CD3 antibodies (24 genes), media compared to stimulation with anti-CD28 antibodies (18 genes) and anti-CD3 compared to anti-CD28 (16 genes). Since the posterior probabilities computed by this method are asymptotically equivalent to *p*-values (see Rubin (1984)) we refer to the results as *p*-values and confidence intervals in the manuscript to use terms more familiar to the audience (although strictly speaking we are reporting posterior probabilities and credible intervals).

We use a sequential rejection sampling algorithm to draw simulations from the posterior distribution in a quick and reliable fashion (Gelman et al. (1995)). By independence across genes and stimulation conditions, we can fit each non-linear regression independently of the rest. Let  $y_k$  denote the measurements from the  $k^{\text{th}}$

experiment. To sample from the posterior, we use the recursion,

$$p(\beta_{1jl}|y_1, \dots, y_k) \propto \int p(y_k|\beta_{1j}, \beta_{0jkl})p(\beta_{1j}|y_1, \dots, y_{k-1})p(\beta_{0k}) d\beta_{0k},$$

that is seen to be true by an application of Bayes theorem and the structure of the model. Here, the integrand is the posterior from the non-linear regression for one experiment with a non-informative prior on the intercept and prior for the decay rate given by the posterior from the previous experiment (in practice it makes sense to start the recursion with an experiment with 4 time points). We used rejection sampling with a histogram based proposal density to simulate from this bivariate distribution. We then numerically integrate the intercept out of the distribution (by summing over this dimension in the samples). From the rates it is easy to get the half-lives (since half-life =  $\log 2 / |\lambda|$ ), so we can draw simulations from the distribution of half-lives. We drew 10,000 samples for each half-life and used these to construct the credible intervals. To compute the y-intercept ( $\beta_{0jkl}$ ) for each transcript under each stimulation condition, we fit a model identical to the model described above with the exception that we supposed there is a common intercept for all experiments.

An essential component of fitting parametric models is checking the assumptions used for parameter estimation. Although we expect the AD values to be approximately normal by the central limit theorem, we examined the residuals from the model as a check on the normality assumption. To make our simulation algorithm as fast as possible, we numerically integrated the experiment specific intercepts out of the posterior, yet these intercepts are clearly necessary to construct sets of residuals. Hence we fit the decay model to a subset of 1,155 genes (chosen to include all of the genes with significant differences) for one of the experiments with 4 time points (we further restricted these diagnostics to the media condition). In this fashion we obtain estimates (the posterior medians) of the intercept and decay rate, and this allows us to define residuals. If we then standardize these residuals by their gene specific standard deviation we should obtain a set of independent, standard normal deviates (4 such deviates for each gene). As a check on normality at the level of the gene, we computed the correlation between the ordered residuals and the corresponding quantiles of the normal distribution. Using the parametric bootstrap, the critical value for this correlation is 0.87 (i.e. 95% of the time we expect that this correlation should exceed 0.87 if the residuals are truly standard normal deviates). For the 1155 genes we used for diagnostic purposes, 42 (about 4%) had correlations less than this value. Hence this check gives no reason to doubt the normality of the errors.

## References

- Berger, J. (1980), *Statistical Decision Theory and Bayesian Analysis*, Springer, New York.
- Box, G., Tiao, G. (1973), *Bayesian Inference in Statistical Analysis*, Wiley.
- Dudoit, S., Yang, Y., Callow, M., Speed, T. (2002), ``Statistical methods for identifying differentially expressed gene in replicated cDNA microarray experiment'', *Statistica Sinica*, 12 111-139.
- Efron, B., Tibshirani, R., Storey, J., Tusher, V. (2001), ``Empirical Bayes analysis of a microarray experiment'', *Journal of the American Statistical Association*, 96, 1151-1160.
- Meng, C., Dempster, A. (1987), ``A Bayesian approach to the multiplicity problem for significance testing with binomial data'', *Biometrics*, 43, 301-311.
- Newton, M., Kendziorski, C., Richmond, C., Blattner, F., Tsui, K. (2001), ``On Differential variability of expression ratios: improving statistical inference about gene expression changes from microarray data'', *Journal of Computational Biology*, 8:37-52.
- Rubin, D. (1984) ``Bayesianly justifiable and relevant frequency calculations for the applied statistician'', *Annals of Statistics*, 12, 1151-1172.
- van der Vaart, A. (1998), *Asymptotic Statistics*, Cambridge University Press, Cambridge.
